# Supplementary material for: Production of Two Isomers of Sphaeralcic Acid in Hairy Roots from Sphaeralcea angustifolia
Source: MDPI journal article supplement (doi:10.3390/plants12051090), 2023-03-01
Supplement: s1 [file s1]

**Table S1.** NMR Spectroscopic Data (CD<sub>3</sub>COCD<sub>3</sub>,  $\delta$  ppm) for stigmasterol y  $\beta$ -sitosterol.

| Position | $\delta^{13}\text{C}$ | $\delta^1\text{H}$           | $\delta^{13}\text{C}$ | $\delta^1\text{H}$  |
|----------|-----------------------|------------------------------|-----------------------|---------------------|
|          | Stigmasterol          | Stigmasterol                 | $\beta$ -sitosterol   | $\beta$ -sitosterol |
| 1        | 37.28                 |                              | 37.28                 |                     |
| 2        | 31.7                  |                              | 31.70                 |                     |
| 3        | 71.82                 | 3.52 (1H,m)                  | 71.82                 | 3.52 (1H,m)         |
| 4        | 42.34                 |                              | 42.34                 |                     |
| 5        | 140.78                |                              | 140.78                |                     |
| 6        | 121.70                | 5.35 (1H,m)                  | 121.71                | 5.35 (1H,m)         |
| 7        | 31.93                 |                              | 31.91                 |                     |
| 8        | 31.93                 | 0.70 (3H,s)                  | 31.88                 |                     |
| 9        | 50.17                 |                              | 50.20                 |                     |
| 10       | 36.53                 |                              | 36.53                 |                     |
| 11       | 21.09                 |                              | 21.07                 |                     |
| 12       | 39.71                 |                              | 39.80                 |                     |
| 13       | 39.8                  |                              | 42.34                 |                     |
| 14       | 56.79                 |                              | 56.79                 |                     |
| 15       | 24.37                 |                              | 24.31                 |                     |
| 16       | 29.20                 |                              | 28.25                 |                     |
| 17       | 55.99                 |                              | 56.09                 |                     |
| 18       | 12.05                 |                              | 11.86                 | 0.68 (3H,s)         |
| 19       | 19.40                 |                              | 19.40                 |                     |
| 20       | 40.47                 |                              | 36.15                 |                     |
| 21       | 21.10                 |                              | 18.79                 |                     |
| 22       | 138.3                 | 5.02 (1H,dd,J=8.6,15.03 Hz)  | 33.98                 |                     |
| 23       | 129.31                | 5.15 (1H, dd, J=8.6,15.1 Hz) | 26.14                 |                     |
| 24       | 51.25                 |                              | 45.88                 |                     |
| 25       | 31.39                 |                              | 28.90                 |                     |
| 26       | 18.99                 |                              | 19.05                 |                     |
| 27       | 21.21                 |                              | 19.81                 |                     |
| 28       | 25.40                 |                              | 23.10                 |                     |
| 29       | 12.23                 |                              | 12.23                 |                     |

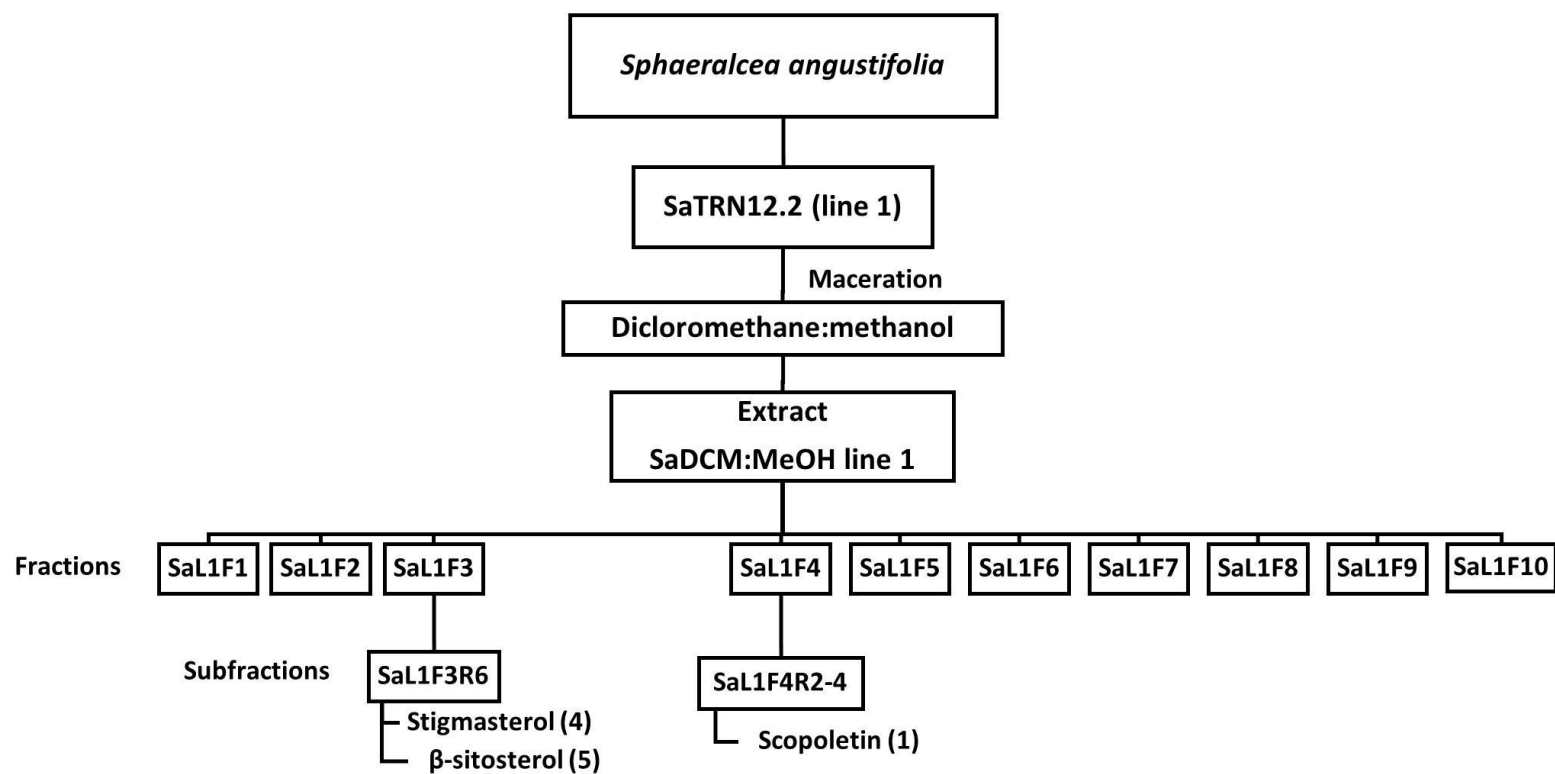

**Figure S1.** Isolation of the active compounds from the SaTRN12.2 (line 1) hairy roots of *Sphaeralcea angustifolia*.

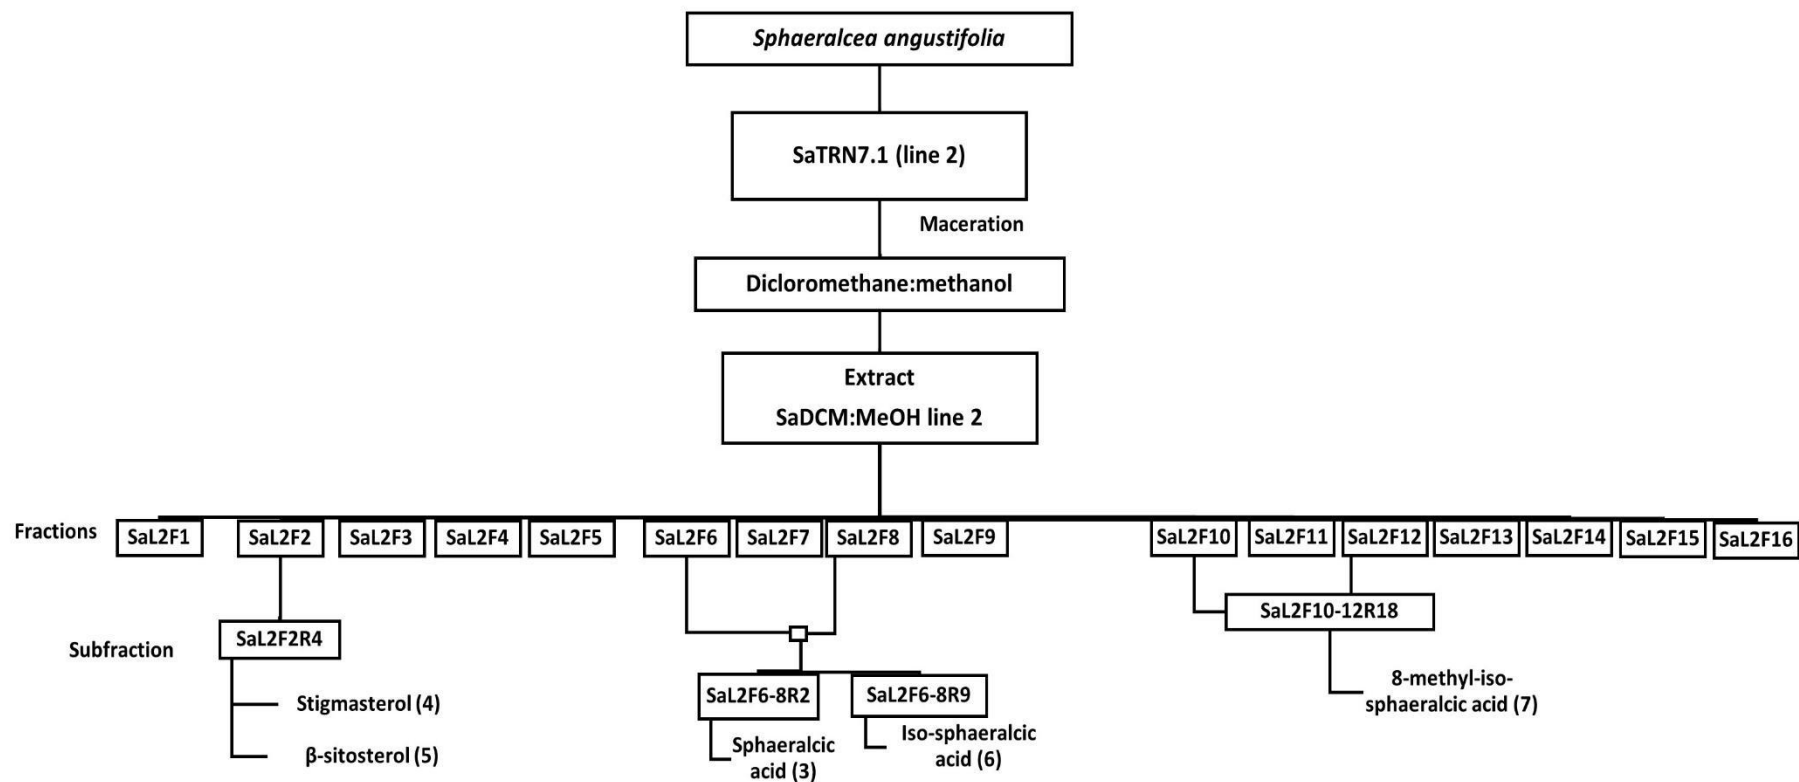

**Figure S2.** Isolation of the active compounds from the SaTRN 7.1 (line 2) hairy roots of *Sphaeralcea angustifolia*.

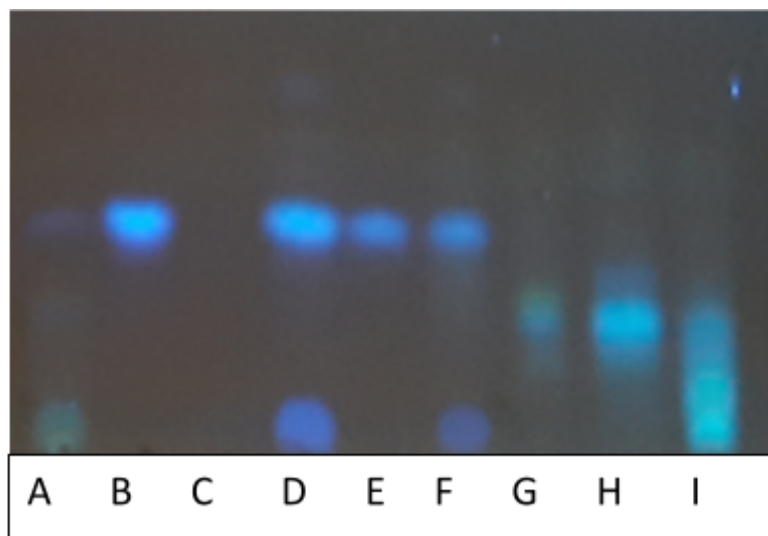

**Figure S3.** Chromatographic elution of (A) SaL1F4 fraction and (C) 1, (D) 2, (E) 3, (F) 4, (G) 5, (H) 6 and (I) 7 sub-fractions from SaTRN12.2 hairy root dichloromethane-methanol extract (line 1), and B) scopoletin standard under UV  $\lambda=365$  nm. Elution system 60:40  $\text{H}_2\text{O}:\text{CH}_3\text{CN}$ .

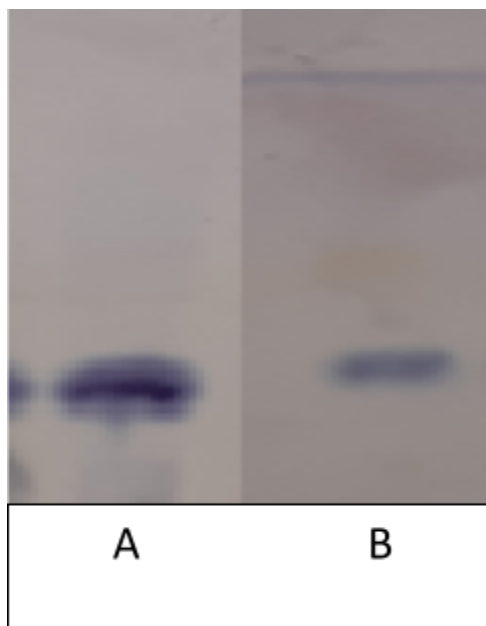

**Figure S4.** Thin layer chromatography for identification of compounds **4** (stigmasterol) and **5** ( $\beta$ -sitosterol) of (A) SaL1F3R6 sub-fraction of SaTRN12.2 hairy roots (line 1) and (B) SaL2F2R4 sub-fraction of SaTRN7.1 hairy root dichloromethane-methanol extract (line 2) exposed to ceric sulphate. Elution system 80:20  $\text{C}_6\text{H}_{14}:\text{CH}_3\text{-COO-CH}_2\text{-CH}_3$ .

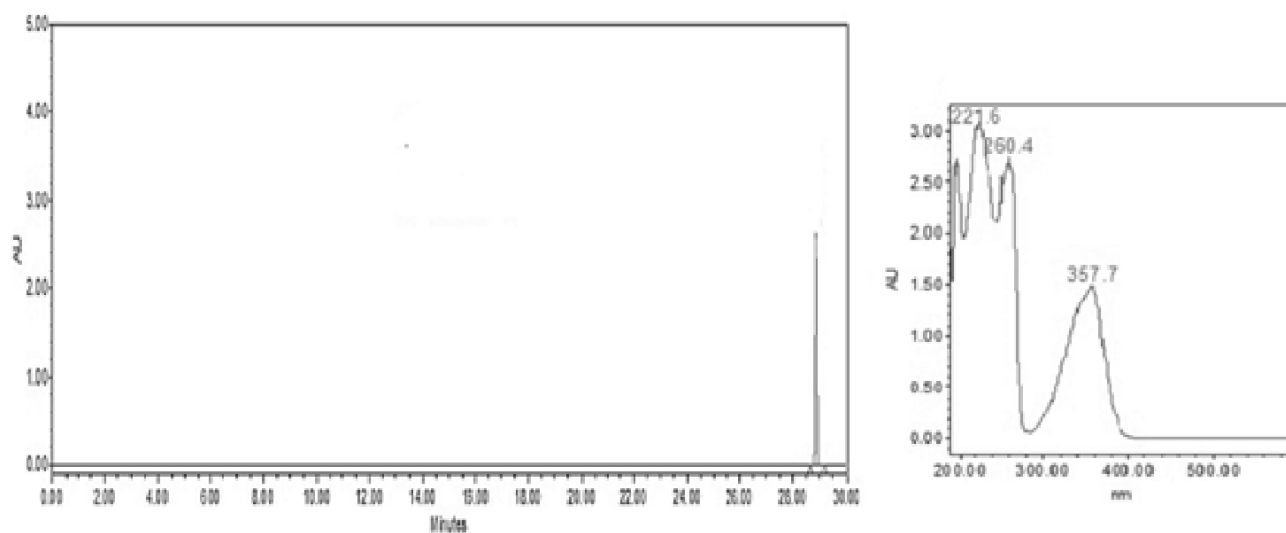

**Figure S5.** HPLC chromatogram profile at  $\lambda = 357$  nm and absorption spectrum of

SaL2F6-8R2 sub-fraction identified as sphaeralcic acid (**3**).

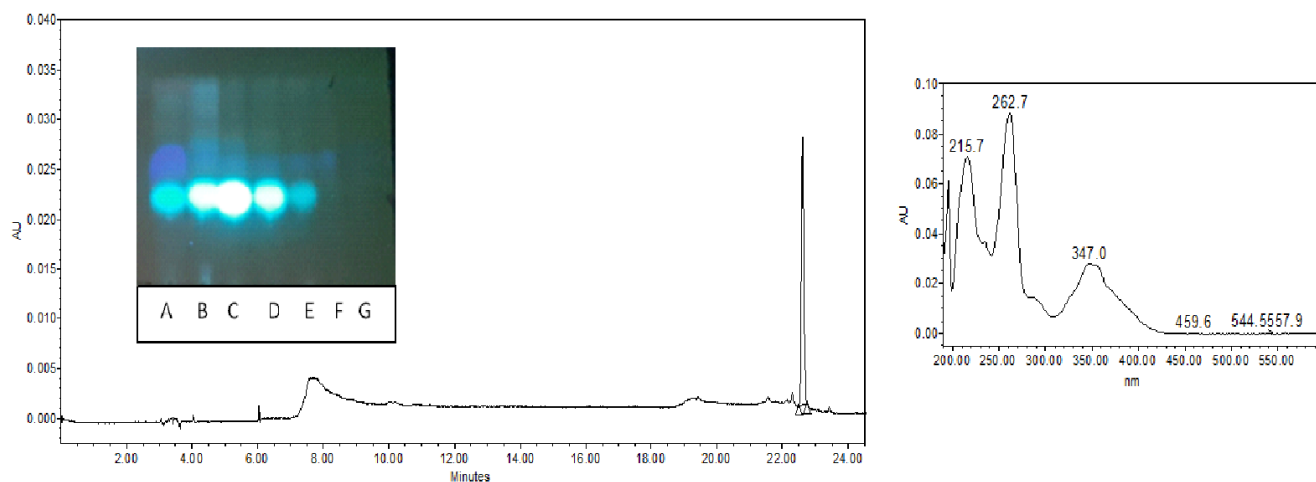

**Figure S6.** HPLC chromatogram profile at  $\lambda=357$  nm and absorption spectrum of SaL2F6-8R9 sub-fraction identified as compound **6** (iso-sphaeralcic acid).

Chromatographic elution of (A) SaL2F6-8 fraction and (B) 8, (C)9, (D) 10, (E) 11, (F) 12 and (G) 13 subfractions from SaTRN7.1 hairy roots (line 2) under UV  $\lambda=365$  nm and an elution system of 80:20  $\text{CH}_2\text{Cl}_2$ :  $\text{CH}_3(\text{CO})\text{CH}_3$ .

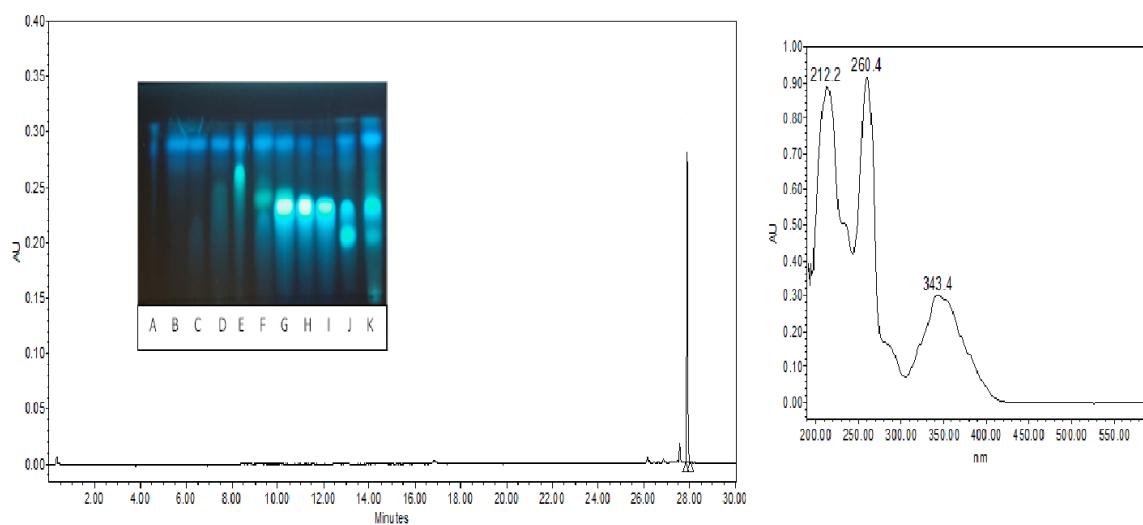

**Figure S7.** HPLC chromatogram profile at  $\lambda=357$  nm and absorption spectrum of SaL2F10-12R18 sub-fraction identified as compound **7** (8-methyl-iso-sphaeralcic acid). Chromatographic elution of sub-fractions (A) 10, (B) 11, (C) 12, (D) 13, (E) 14, (F) 15, (G) 16, (H) 17, (I) 18 (J) 19 and (K) SaL2F10-12 fraction from SaTRN7.1 hairy root dichloromethane-methanol extract (line 2) under UV  $\lambda=365$  nm and an elution system of 30:70 H<sub>2</sub>O:CH<sub>3</sub>CN.



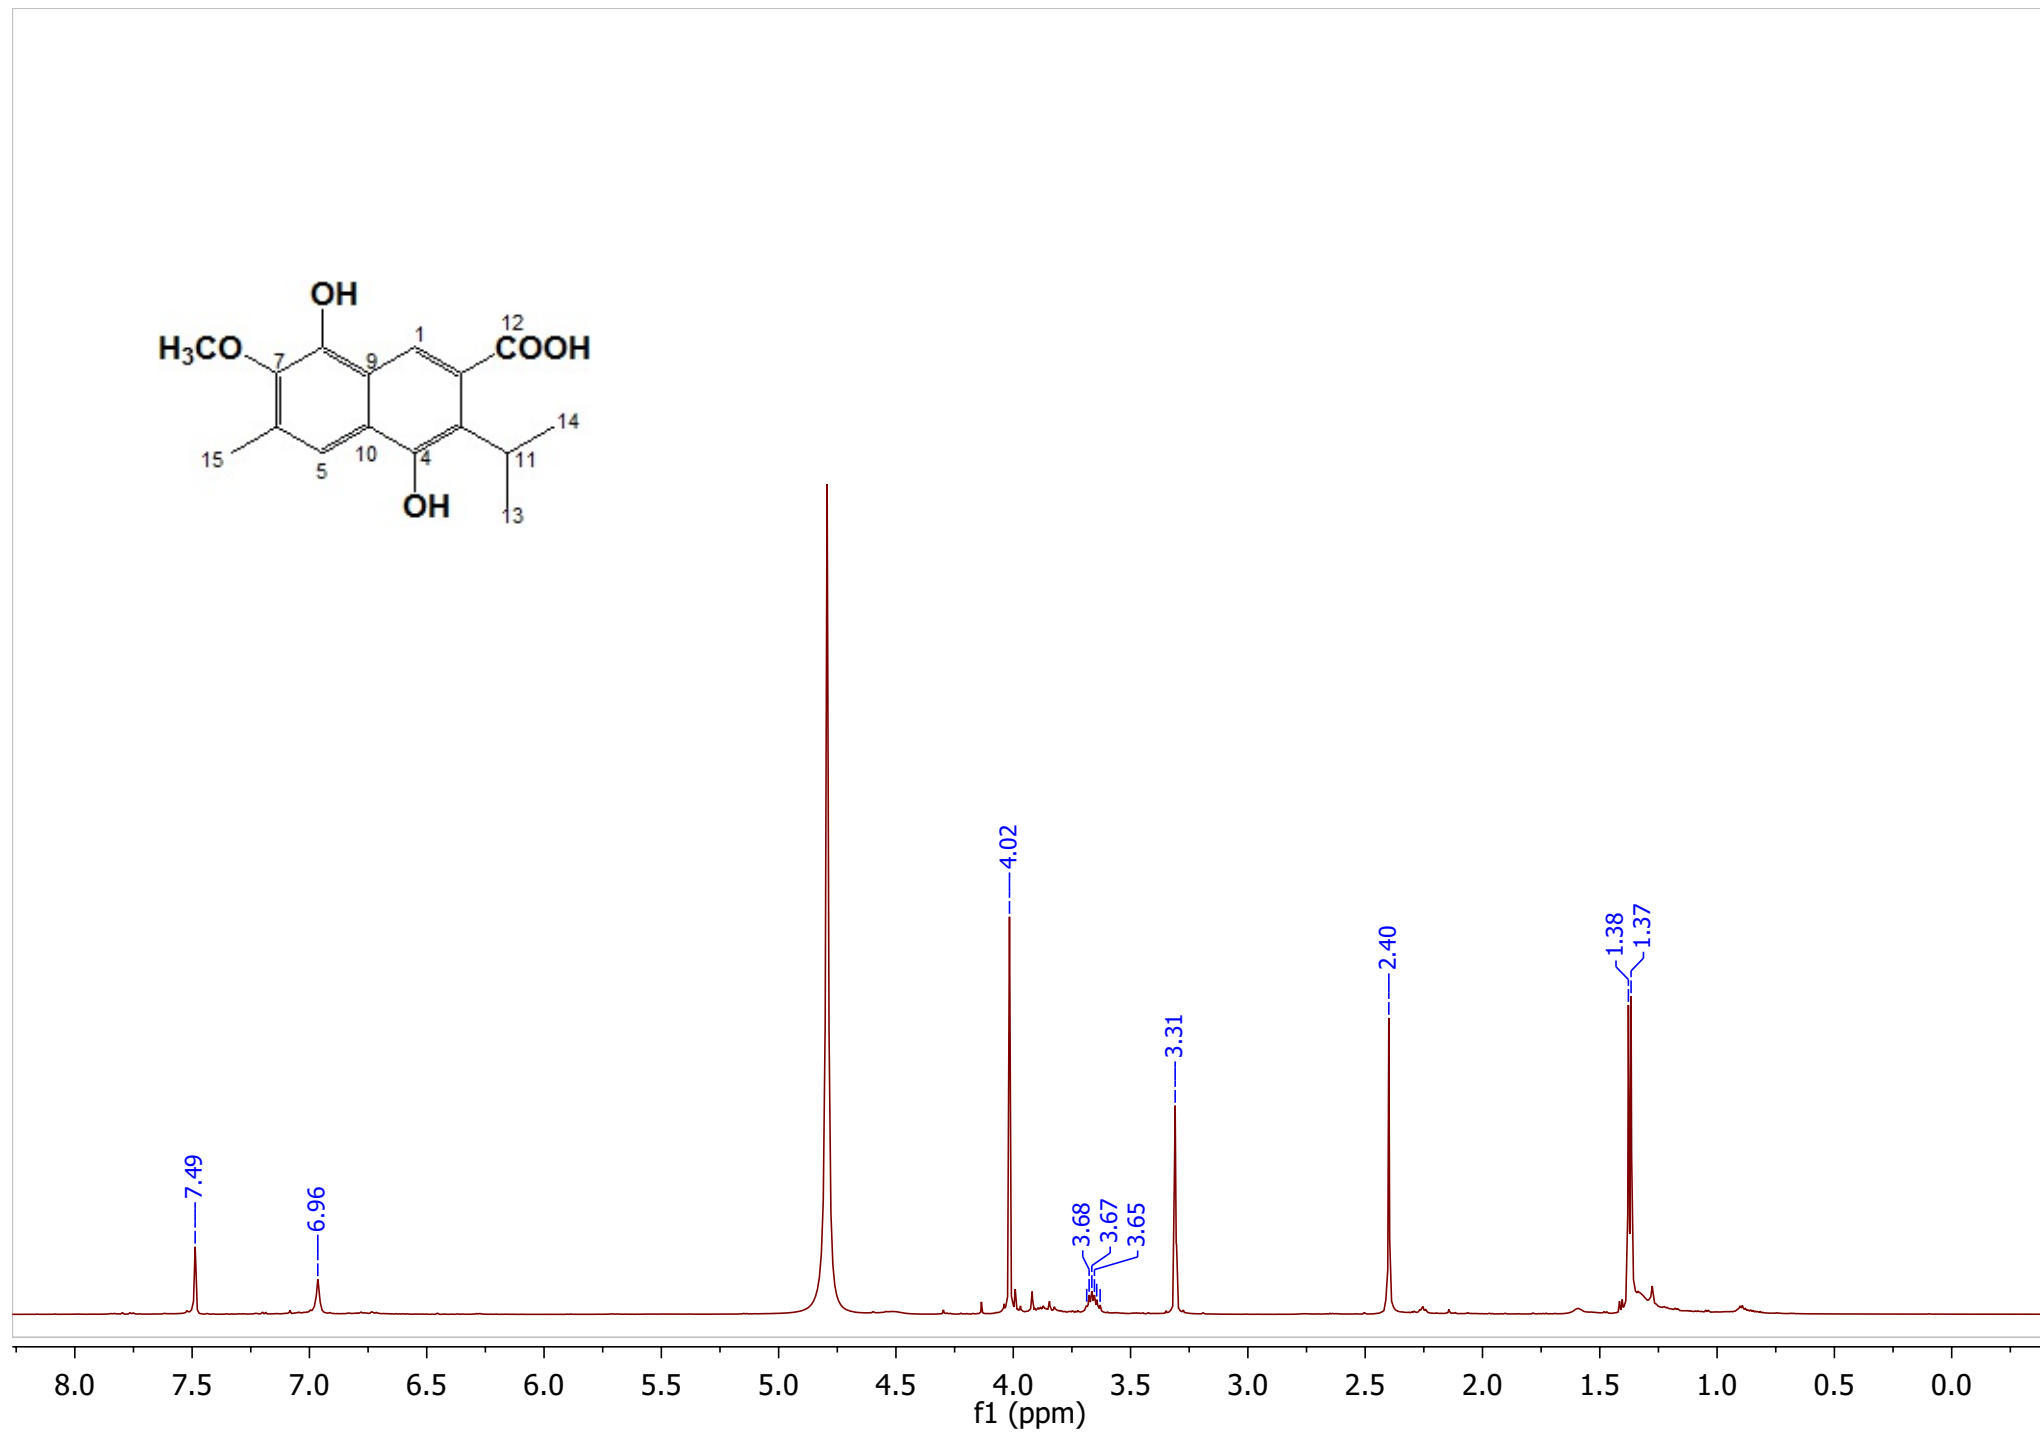

Figure S8.  $^1\text{H}$ -NMR ( $\text{CD}_3\text{OD}$ , 600 MHz) of iso-sphaeralcic acid (**6**)

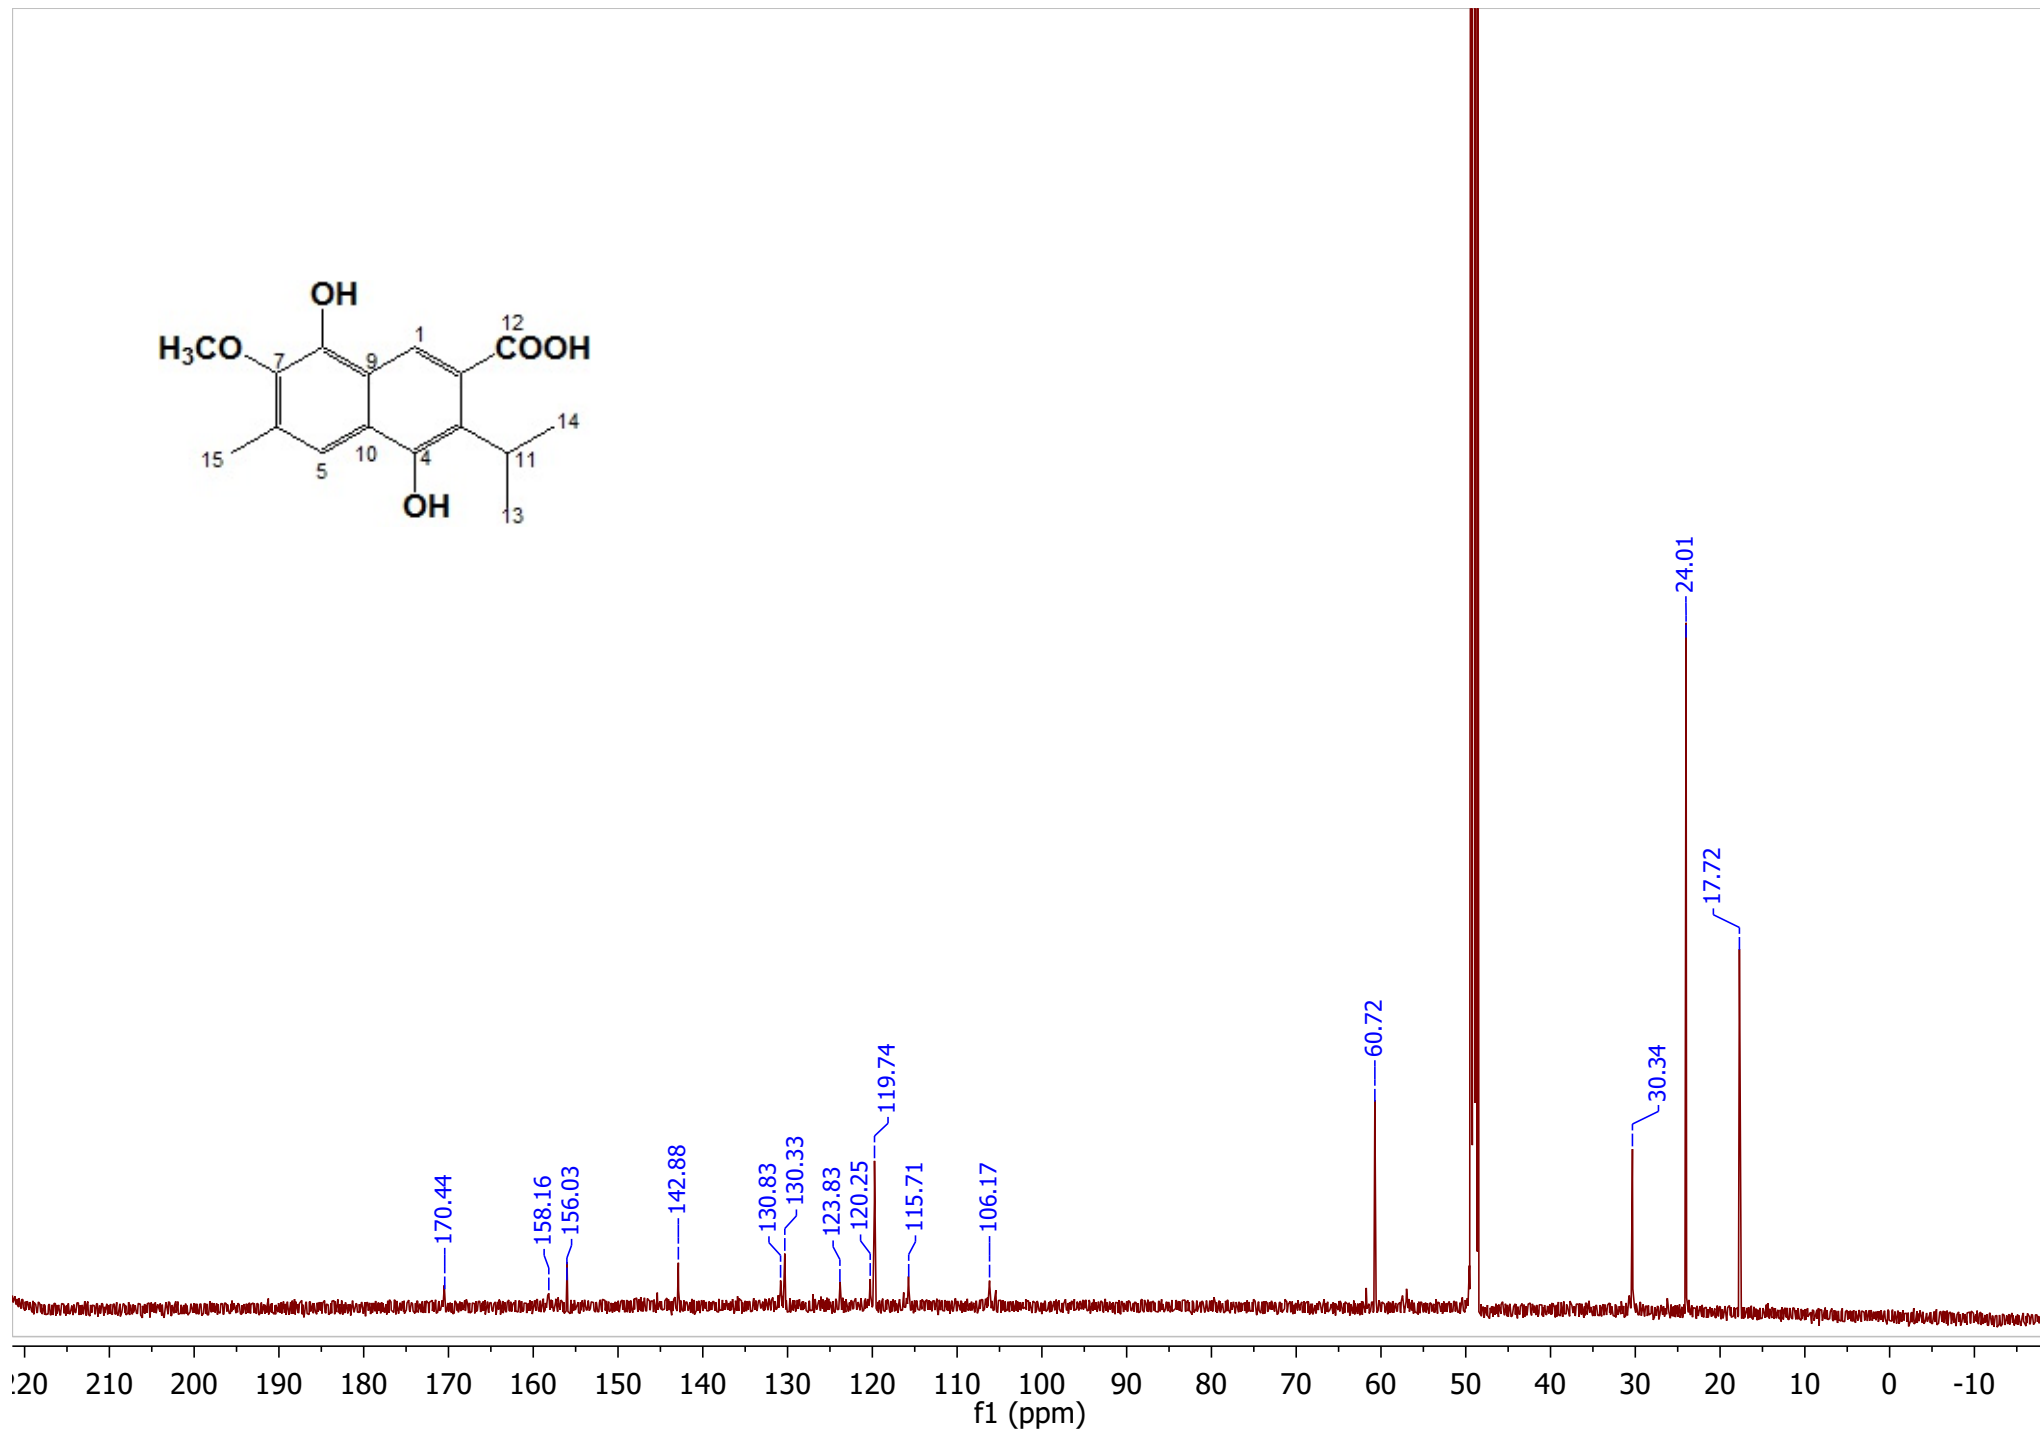

Figure S9. <sup>13</sup>C-NMR (CD<sub>3</sub>OD, 150 MHz) of iso-sphaeralcic acid (6)

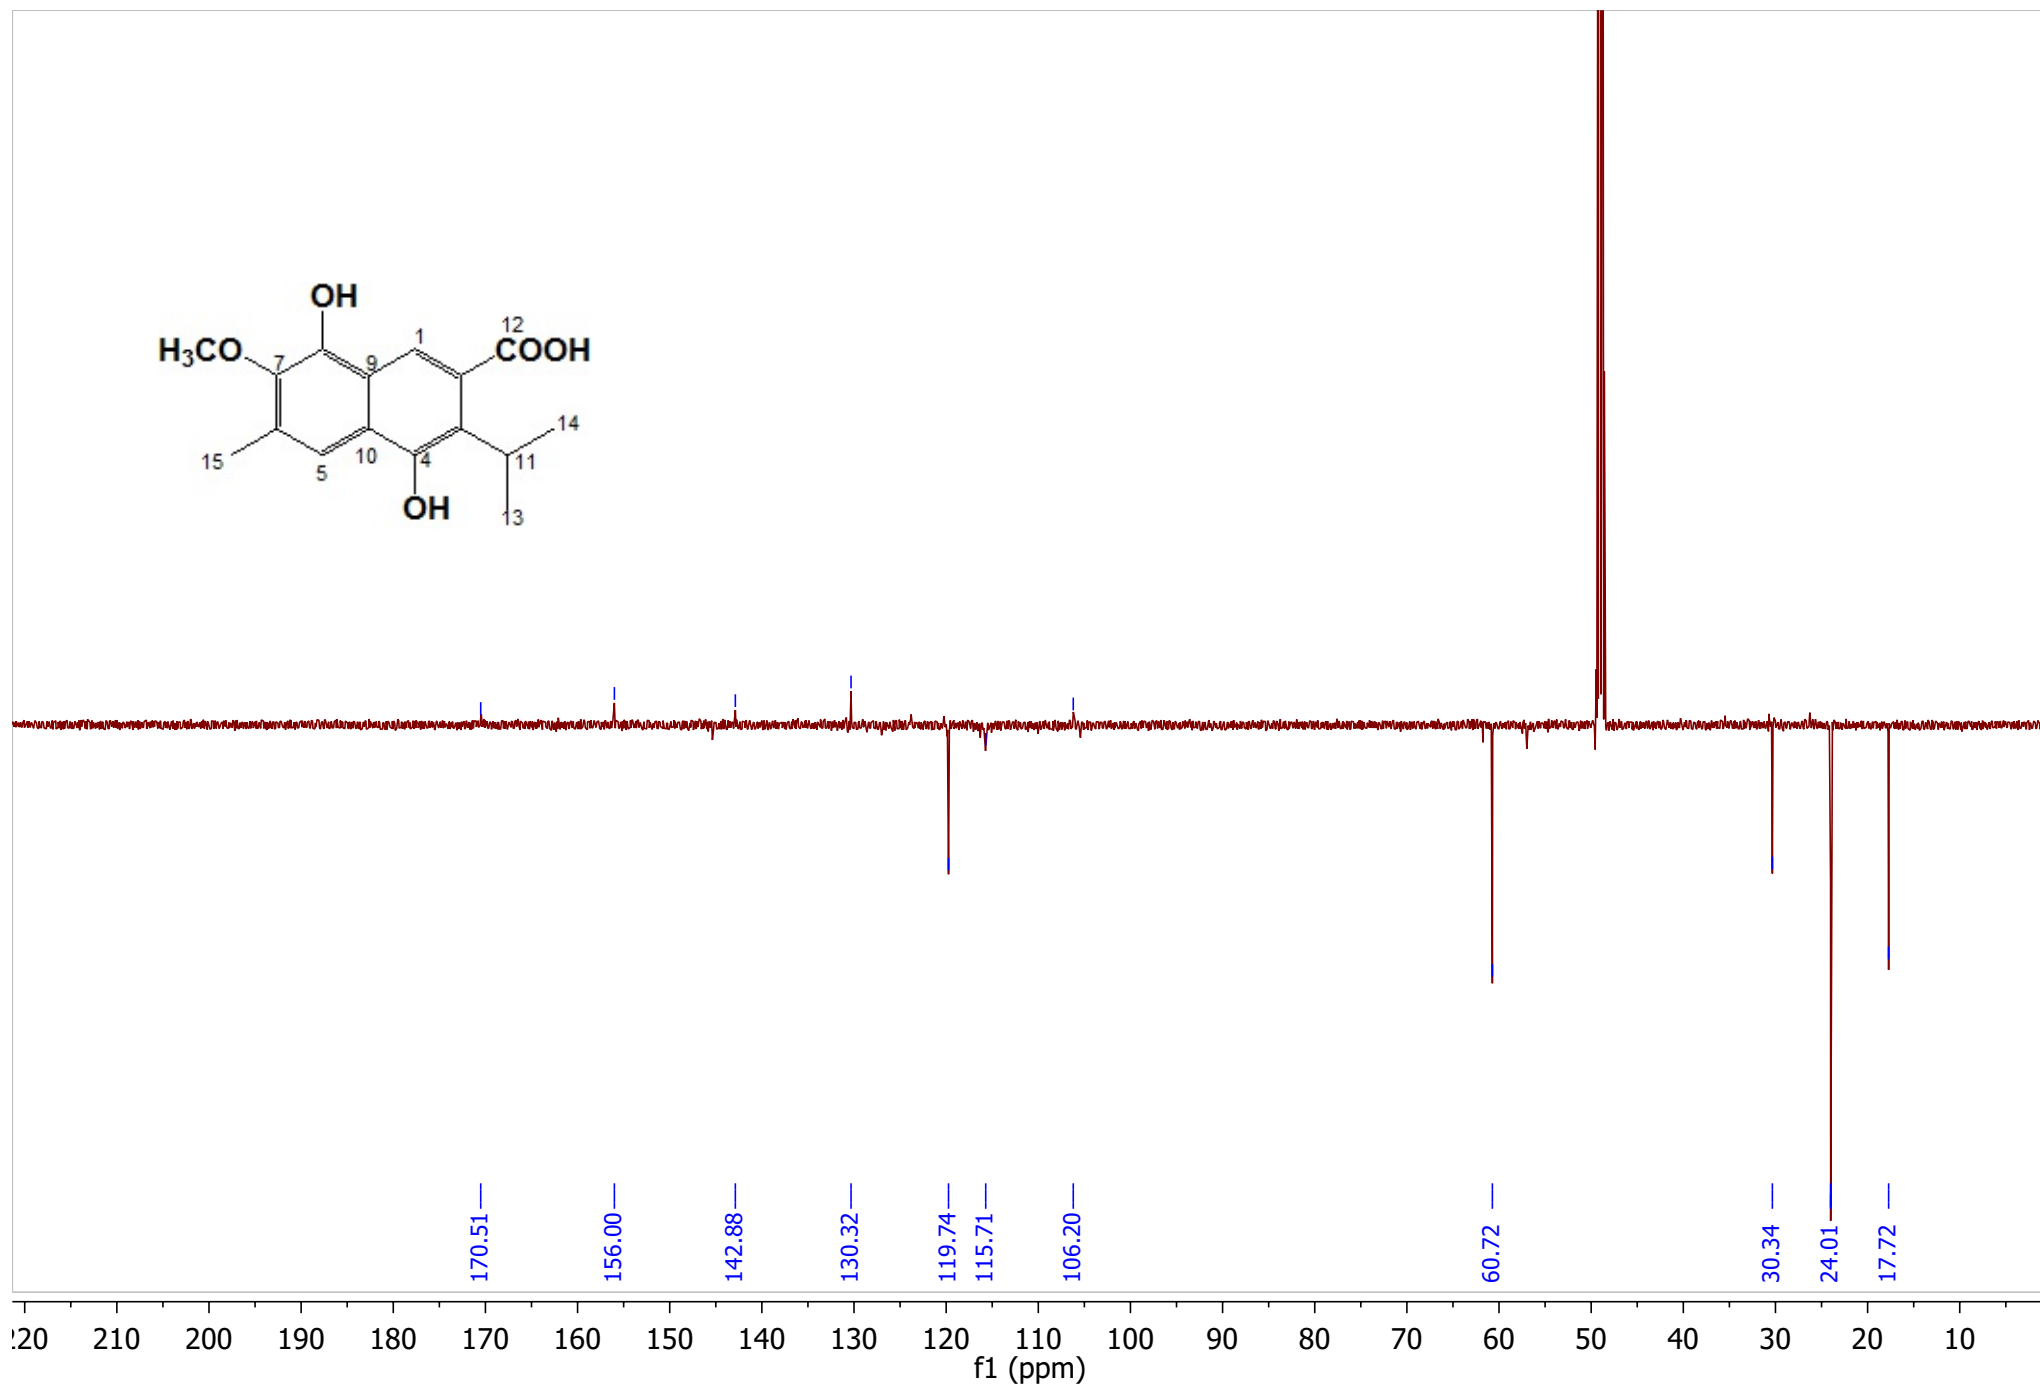

Figure S10.  $^{13}\text{C}$ -DEPT NMR ( $\text{CD}_3\text{OD}$ , 150 MHz) of iso-sphaeralcic acid (6)

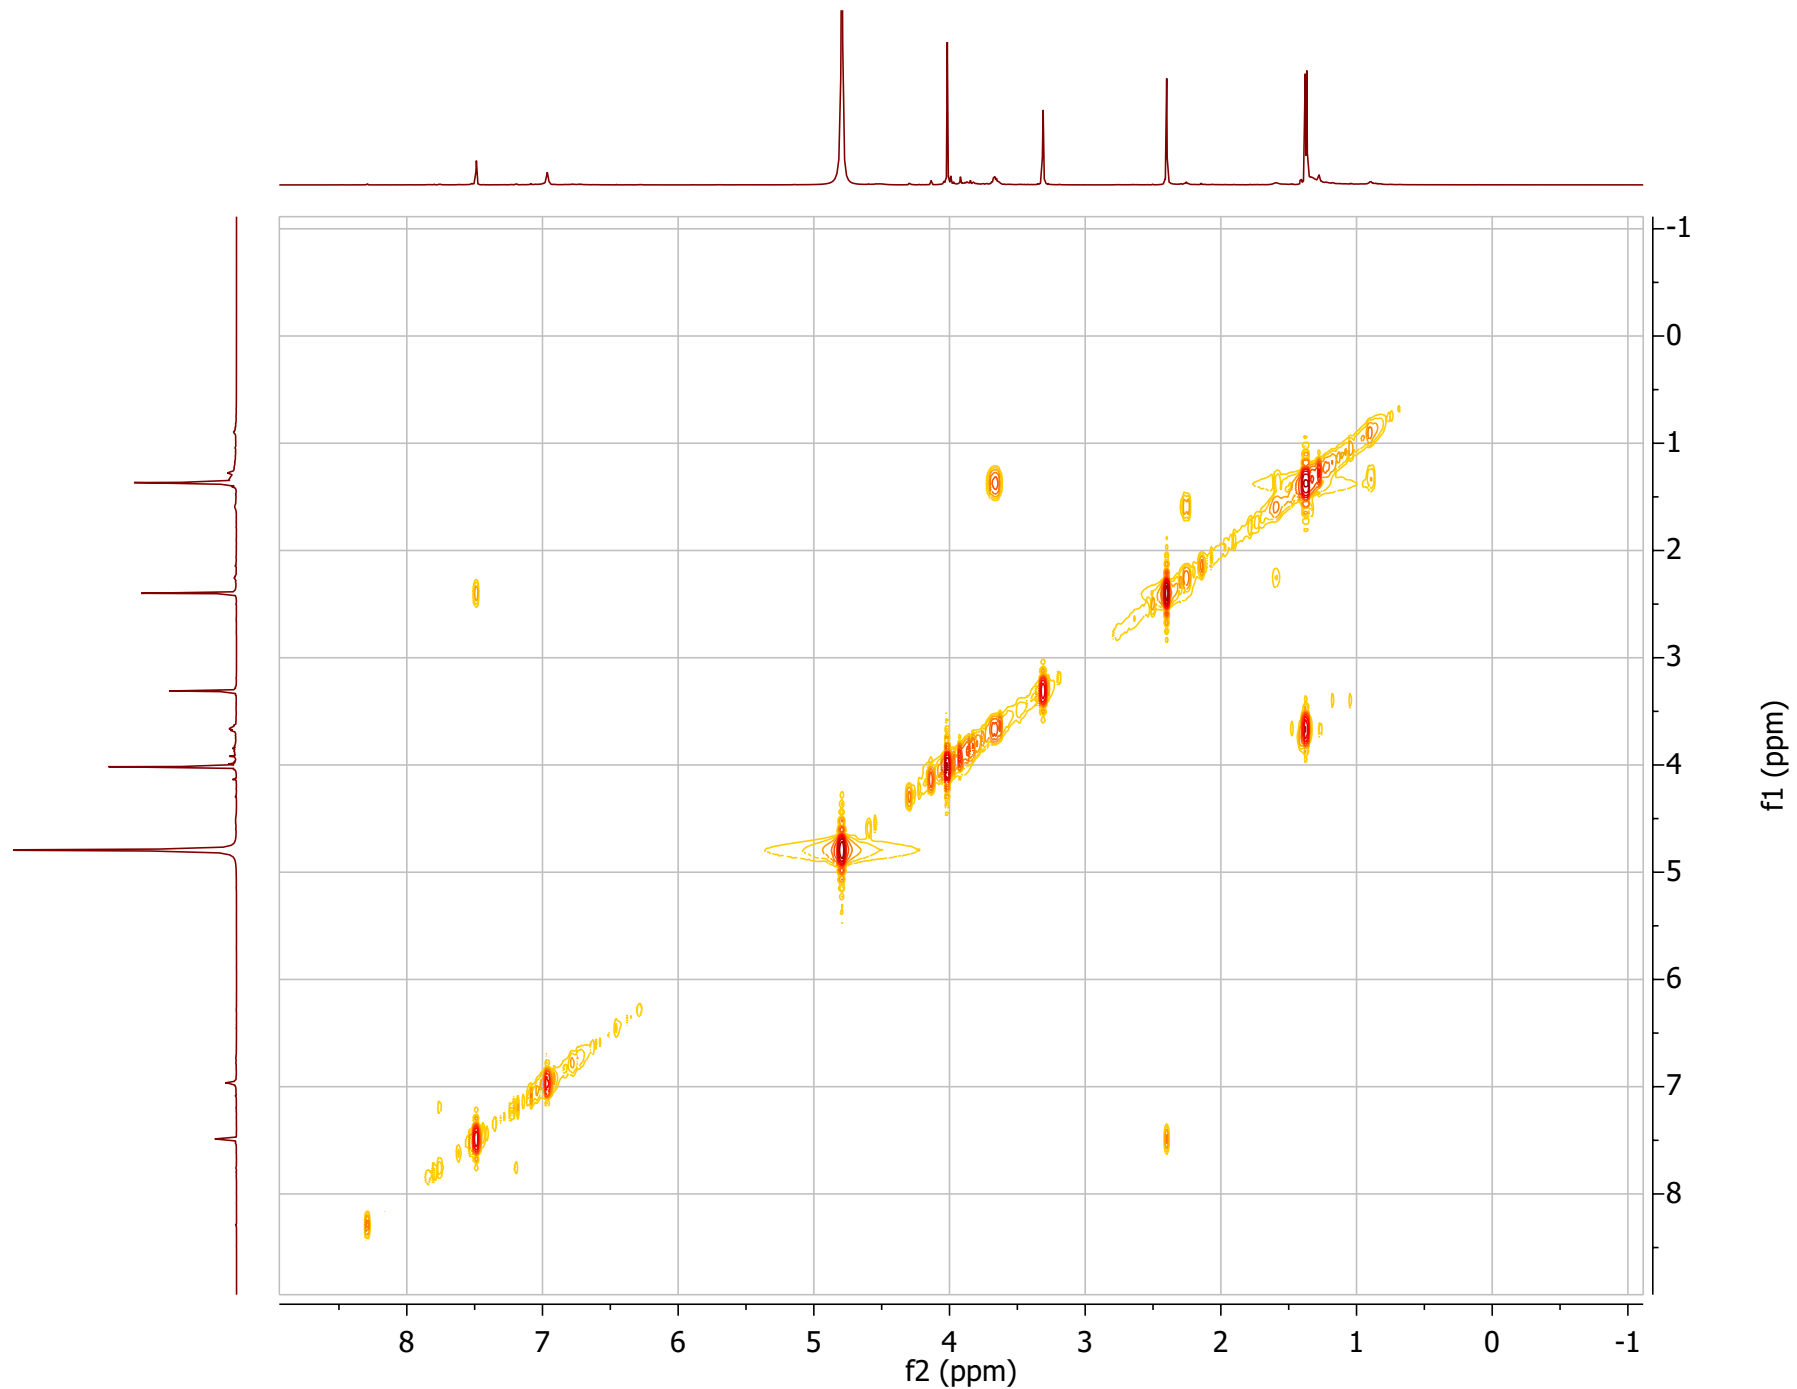

Figure S11.  $^1\text{H}$ - $^1\text{H}$  (COSY) NMR ( $\text{CD}_3\text{OD}$ , 600 MHz) of iso-sphaeralcic acid (**6**)

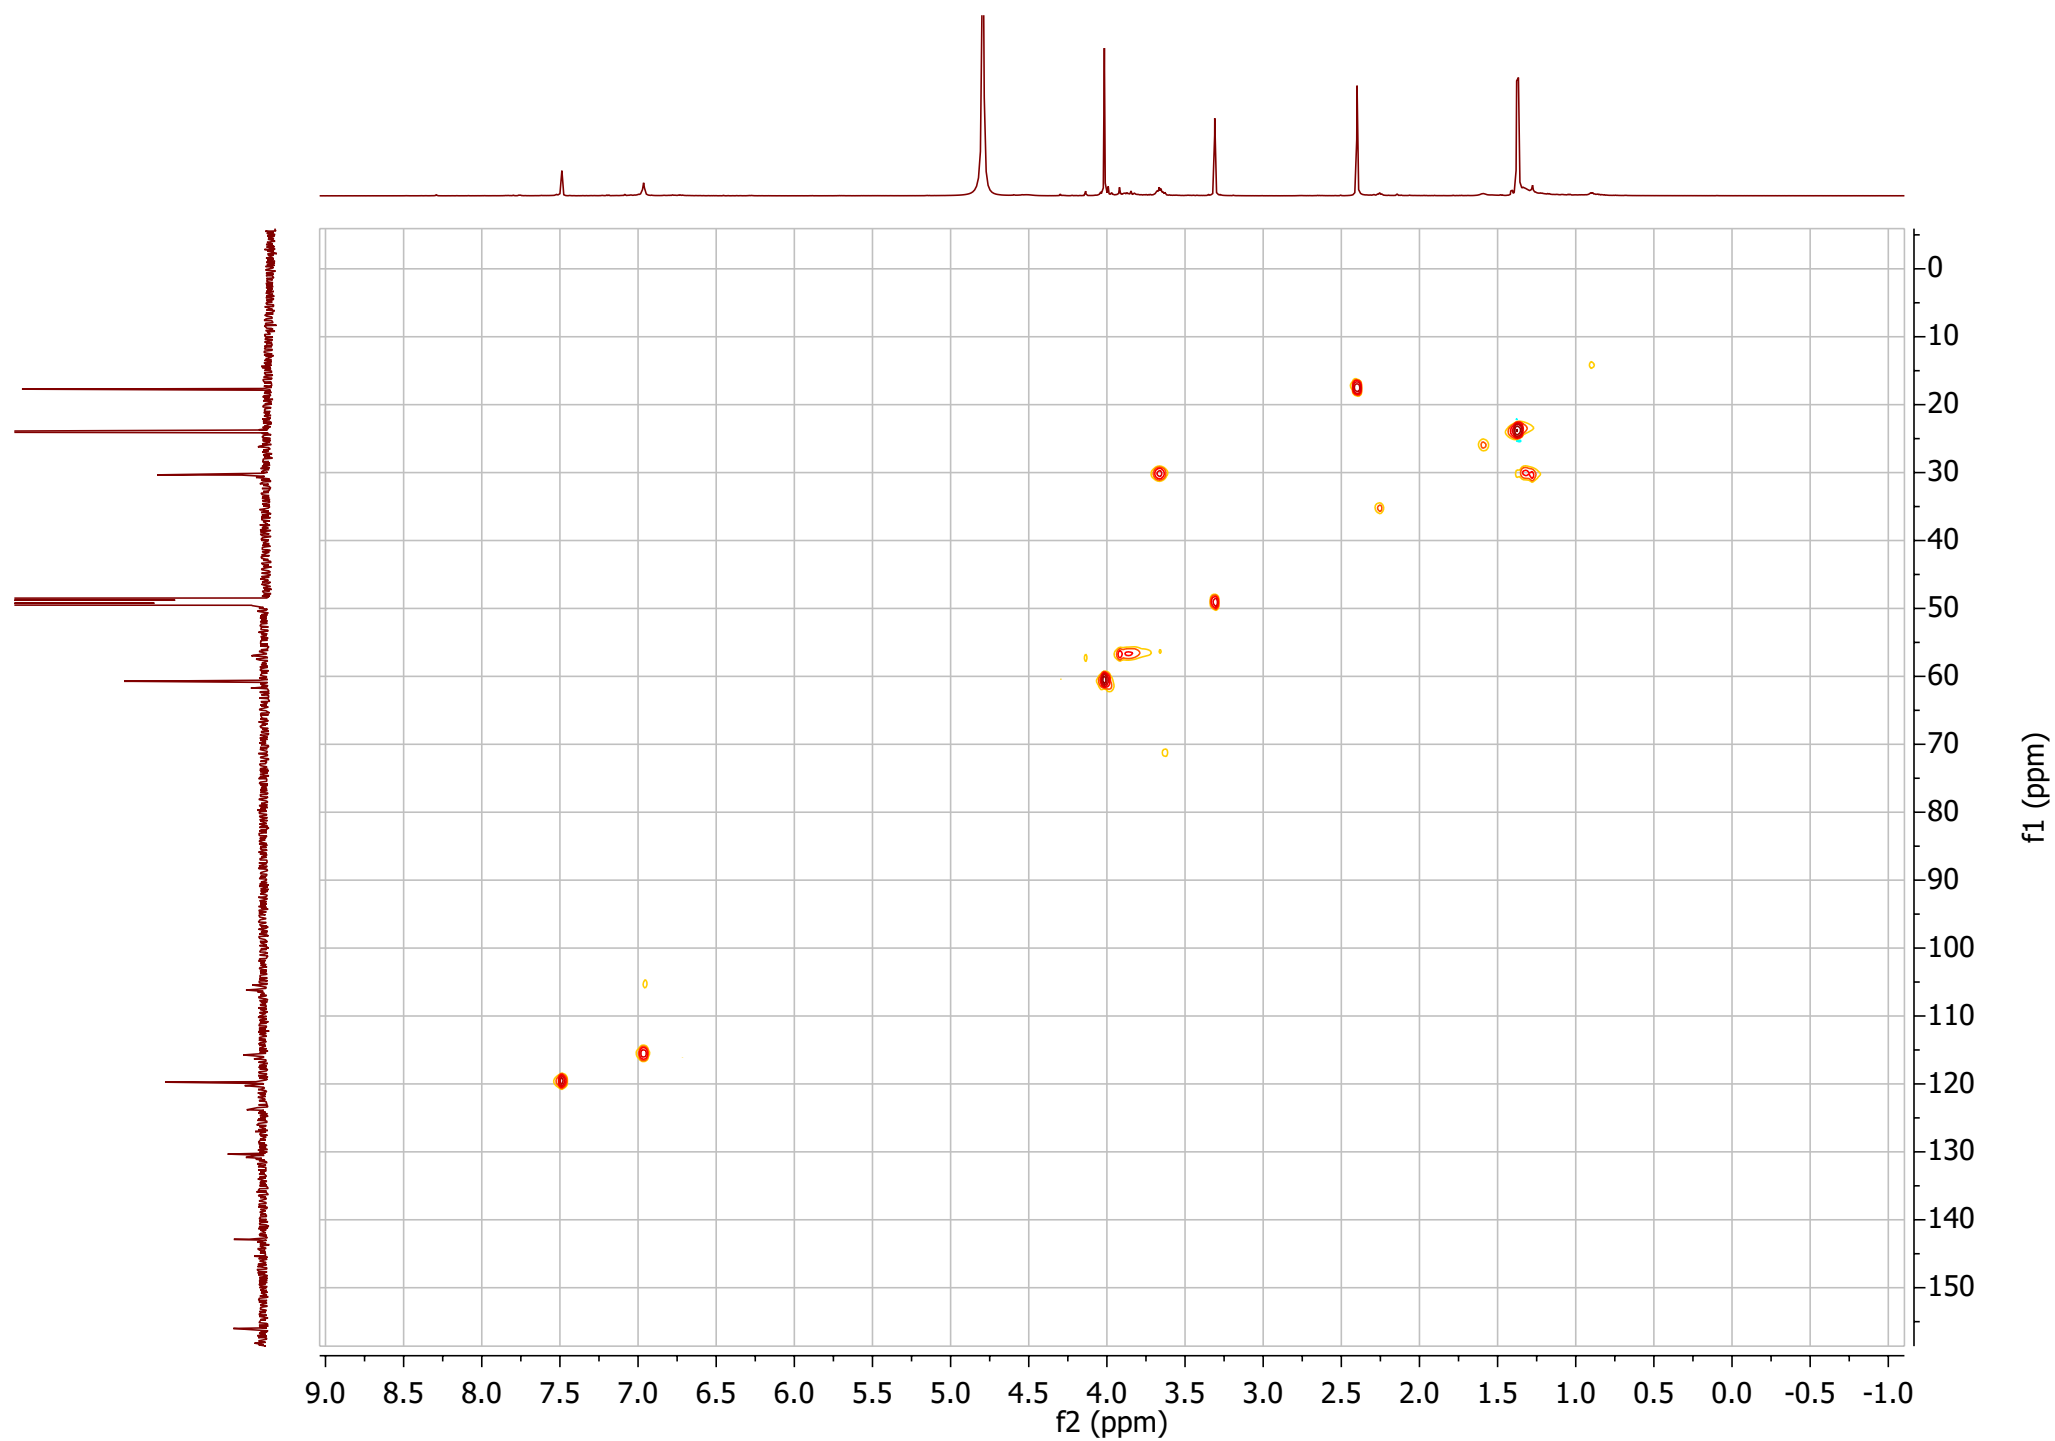

Figure S12.  $^1\text{H}$ - $^{13}\text{C}$  (HSQC) NMR ( $\text{CD}_3\text{OD}$ , 600 MHz) of iso-sphaeralcic acid (**6**)

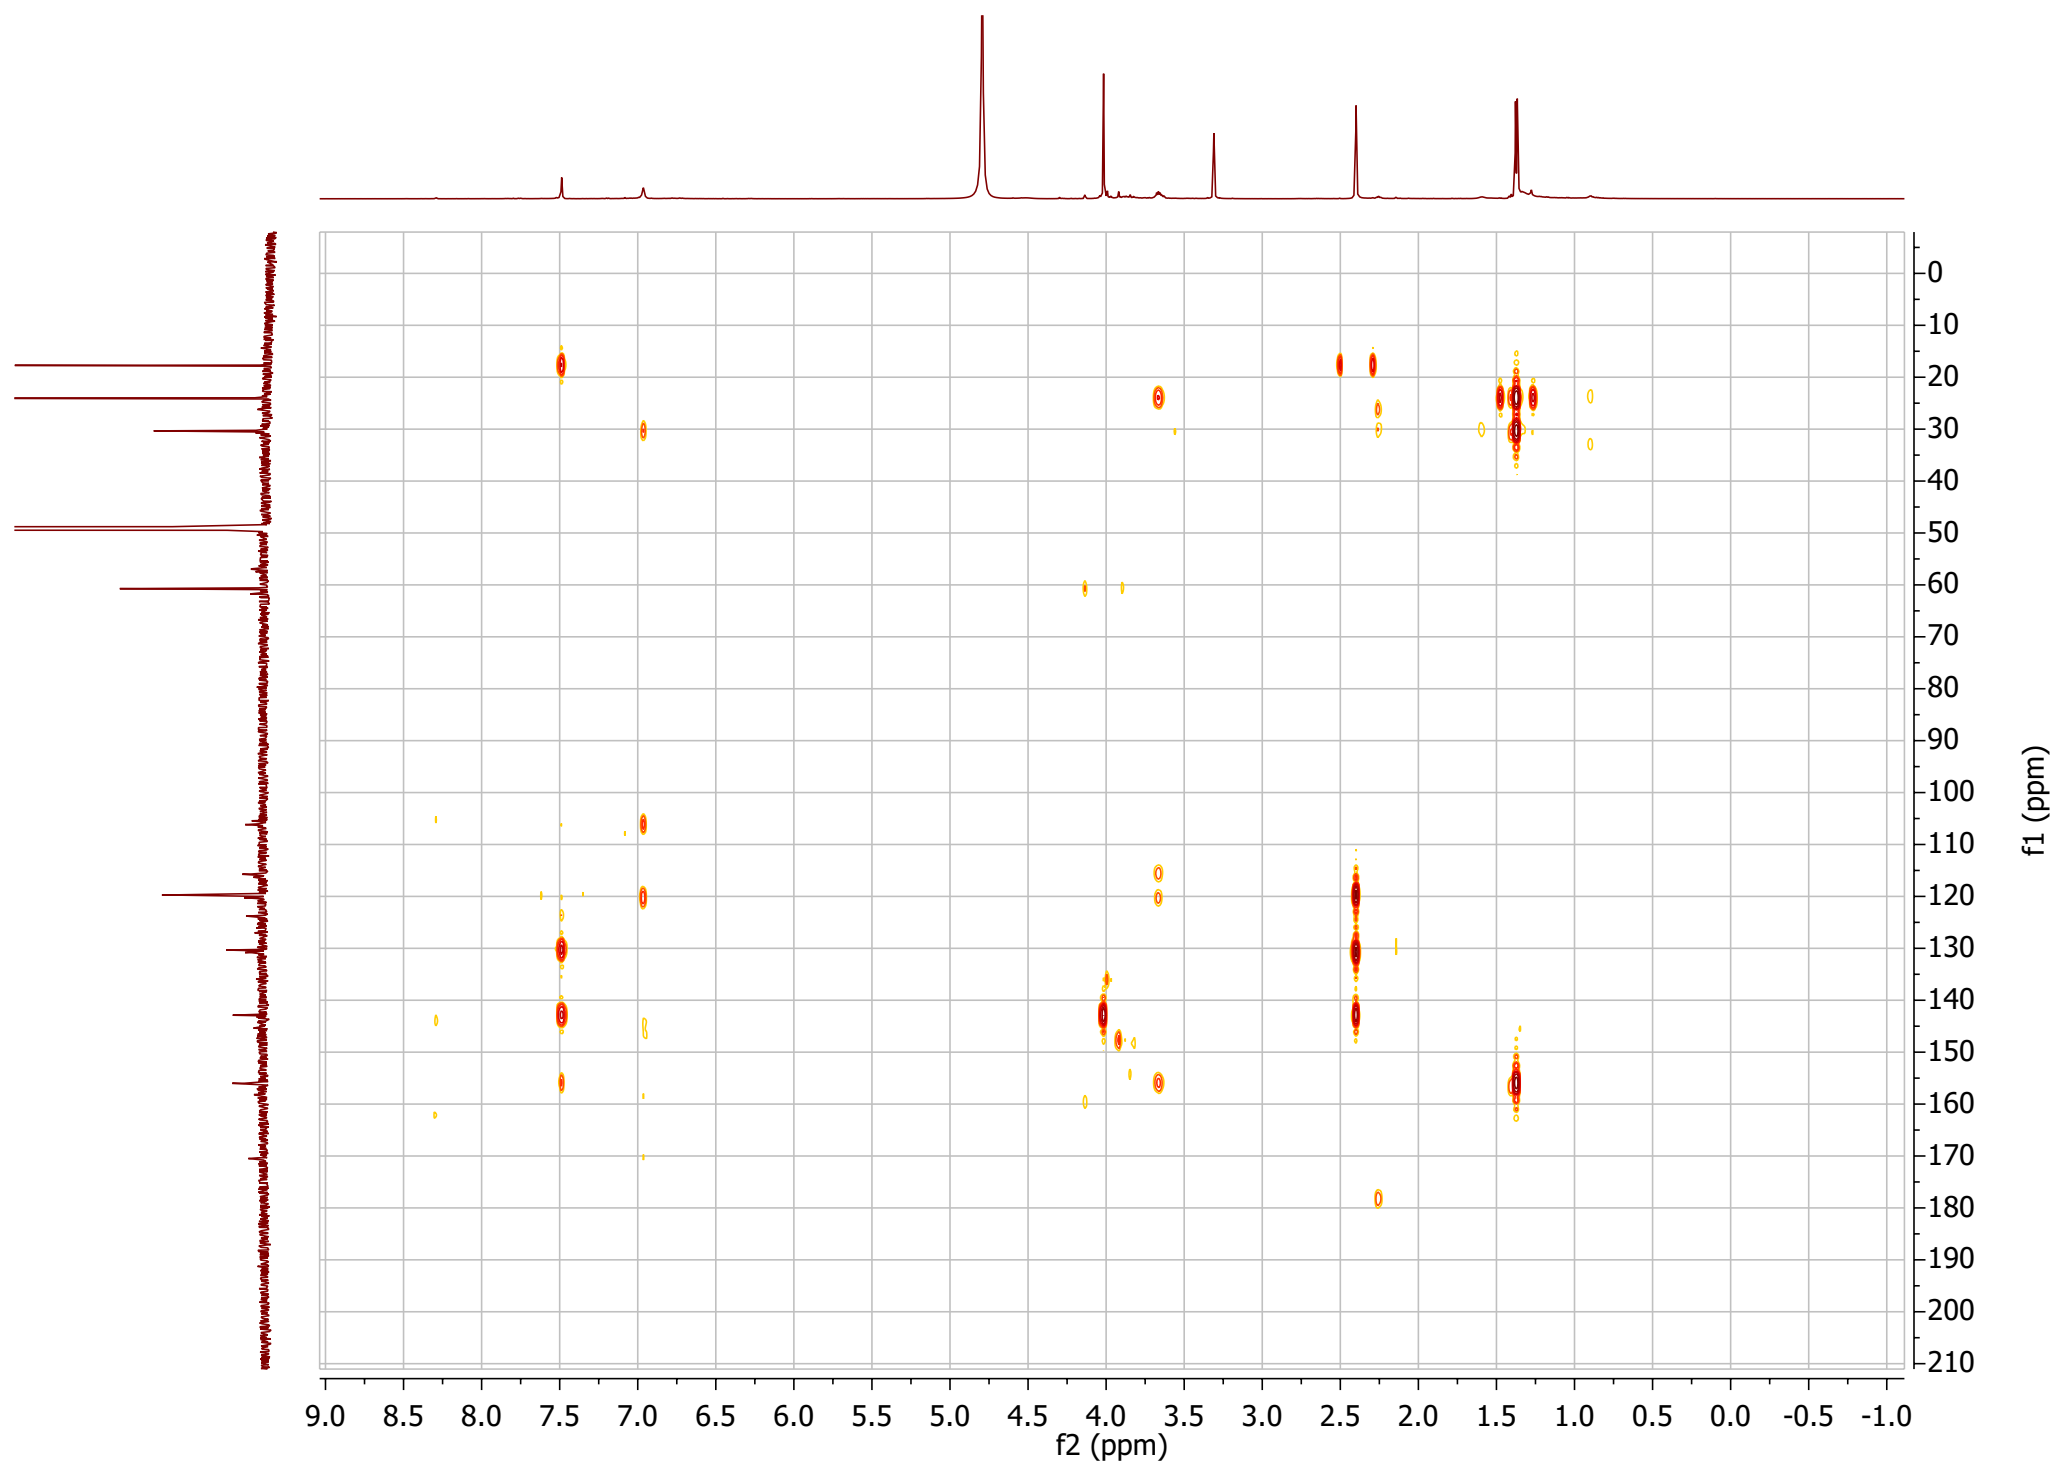

Figure S13.  $^1\text{H}$ - $^{13}\text{C}$  (HMBC) NMR ( $\text{CD}_3\text{OD}$ , 600 MHz) of iso-sphaeralcic acid (**6**)

[ Mass Spectrum ]

Data : 010LEM

Date : 20-Feb-2023 10:01

Sample: SaKR16

Operator name M.en ITA Victoria Labastida G. Ins

Note : CIBSur/Dra.Maribel Herrera Centro de Investigaciones Químicas UAEM

Inlet : Direct

Ion Mode : FAB+

Spectrum Type : Normal Ion [MF-Linear]

RT : 0.51 min

Scan# : (4,6)

BP : m/z 154.0000

Int. : 165.12

Output m/z range : 40.0000 to 800.0000

Cut Level : 0.00 %

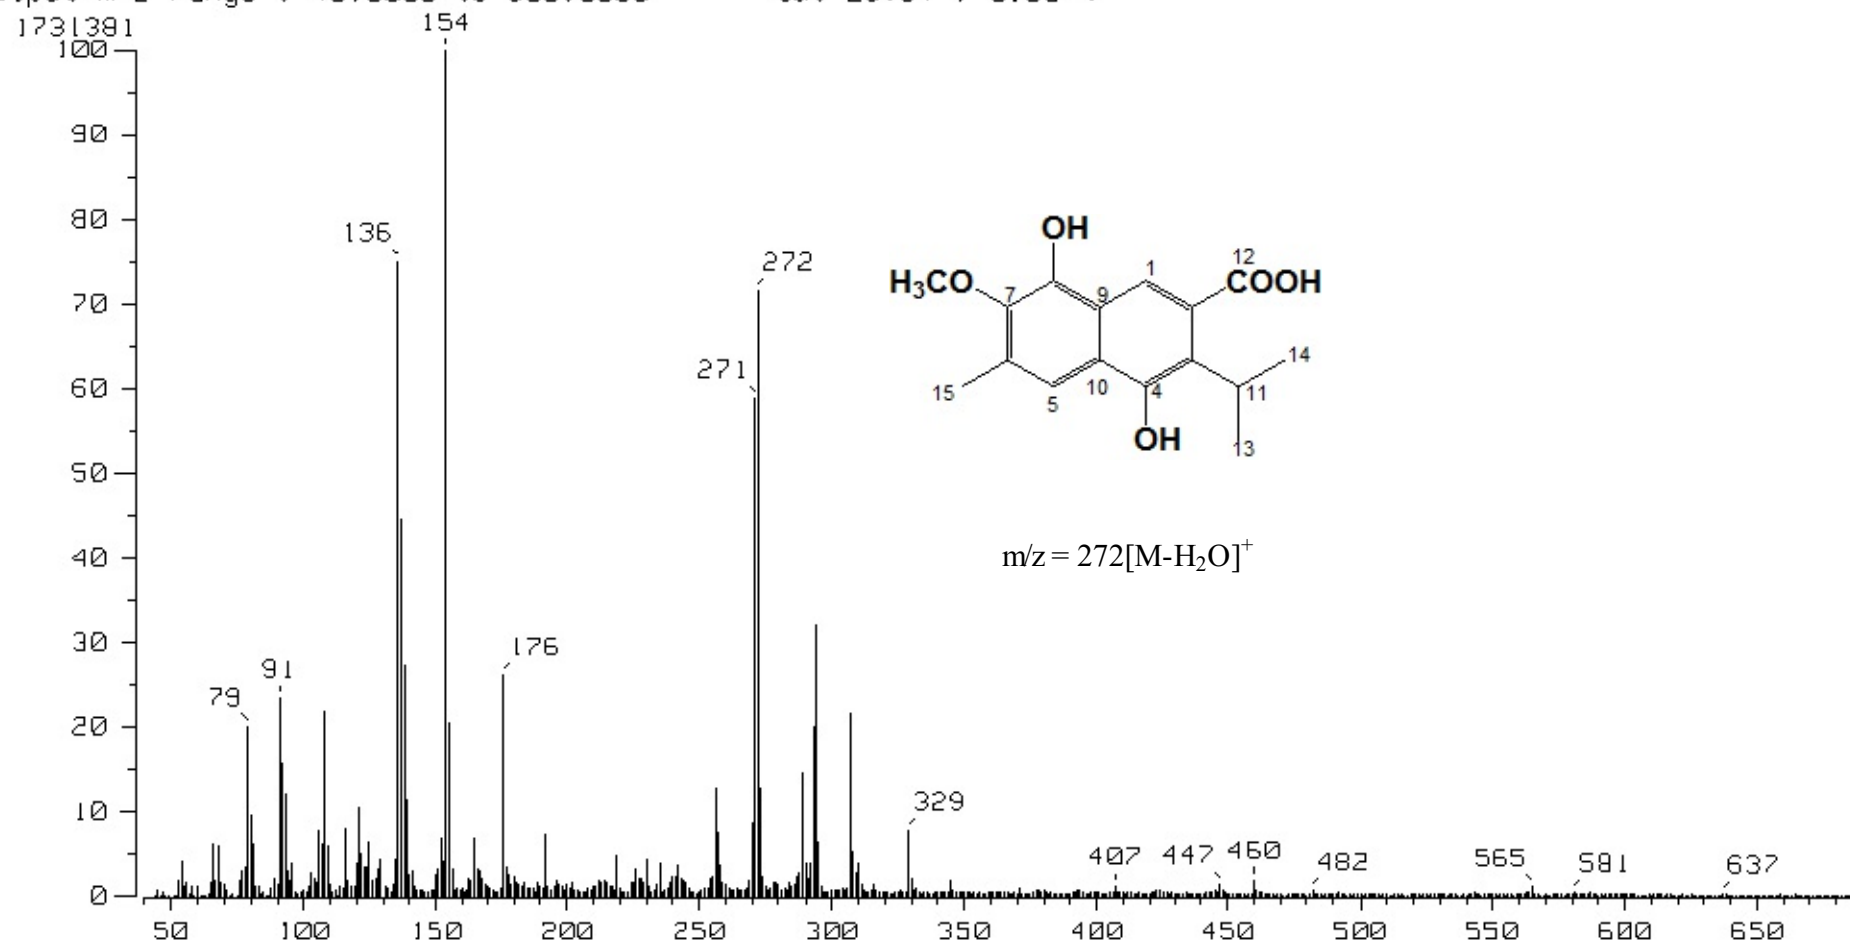

Figure S14. Mass spectrum (FAB-MS) of iso-sphaeralcic acid (6)

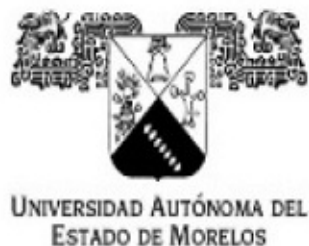

**Servicio de Espectrometría de Masas**  
**MStation JMS-700 JEOL Alta Resolución**  
 Centro de Investigaciones Químicas UAEM  
 Tel. 329-79-97 ext.6013

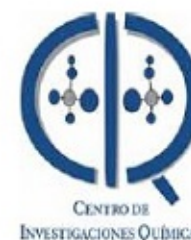

[ Elemental Composition ]

Data : 010LEM-HR

Date : 20-Feb-2023 10:03

Sample: SaKR16

Operator name M.en ITA Victoria Labastida G. I

Note : CIBSur/Dra. Maribel Herrera Centro de Investigaciones Químicas UAEM

Inlet : Direct

Ion Mode : FAB+

RT : 0.08 min

Scan#: 3+(42,49)

Elements : C 40/0, H 49/0, O 5/0

Mass Tolerance : 1000ppm, 3mmu if m/z < 3, 17mmu if m/z > 17

Unsaturation (U.S.) : -0.5 - 9.0

| Observed m/z | Int%  | Err [ppm / mmu] | U.S. | Composition   |
|--------------|-------|-----------------|------|---------------|
| 272.1219     | 100.0 | +62.5 / +17.0   | 9.0  | C 16 H 16 O 4 |

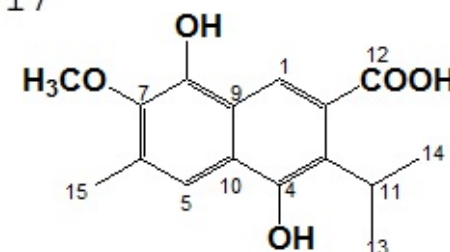

m/z = 272[M-H<sub>2</sub>O]<sup>+</sup>  
 C<sub>16</sub>H<sub>16</sub>O<sub>4</sub>

Figure S15. High resolution mass spectrum (HRFAB-MS) of iso-sphaeralcic acid (**6**)



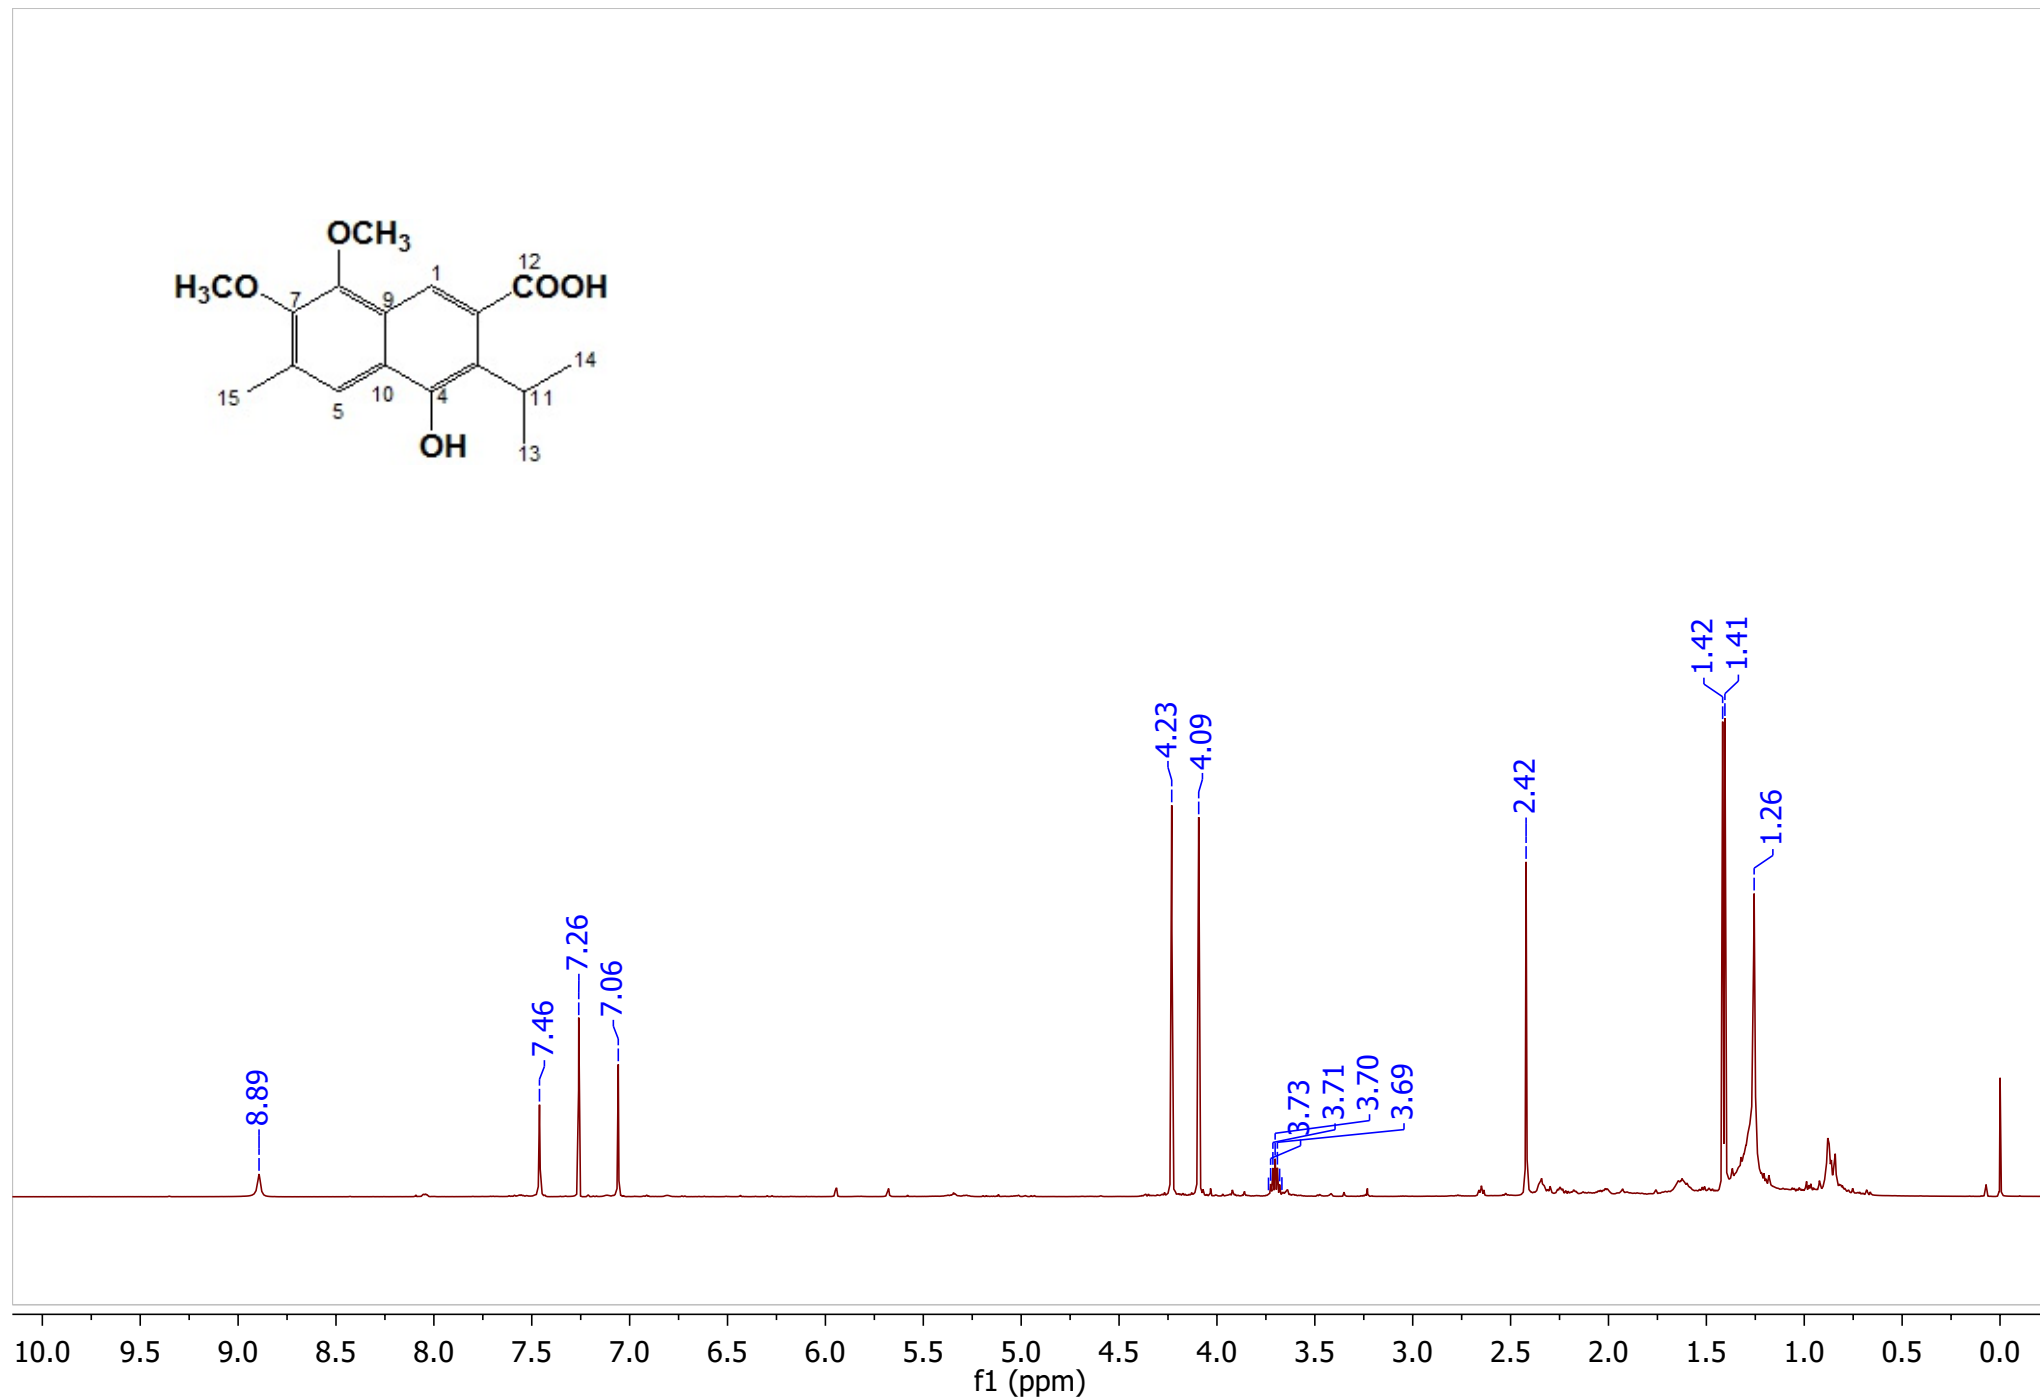

Figure S16. <sup>1</sup>H-NMR (CDCl<sub>3</sub>, 600 MHz) of 8-methyl-iso-sphaeralcic acid (7)

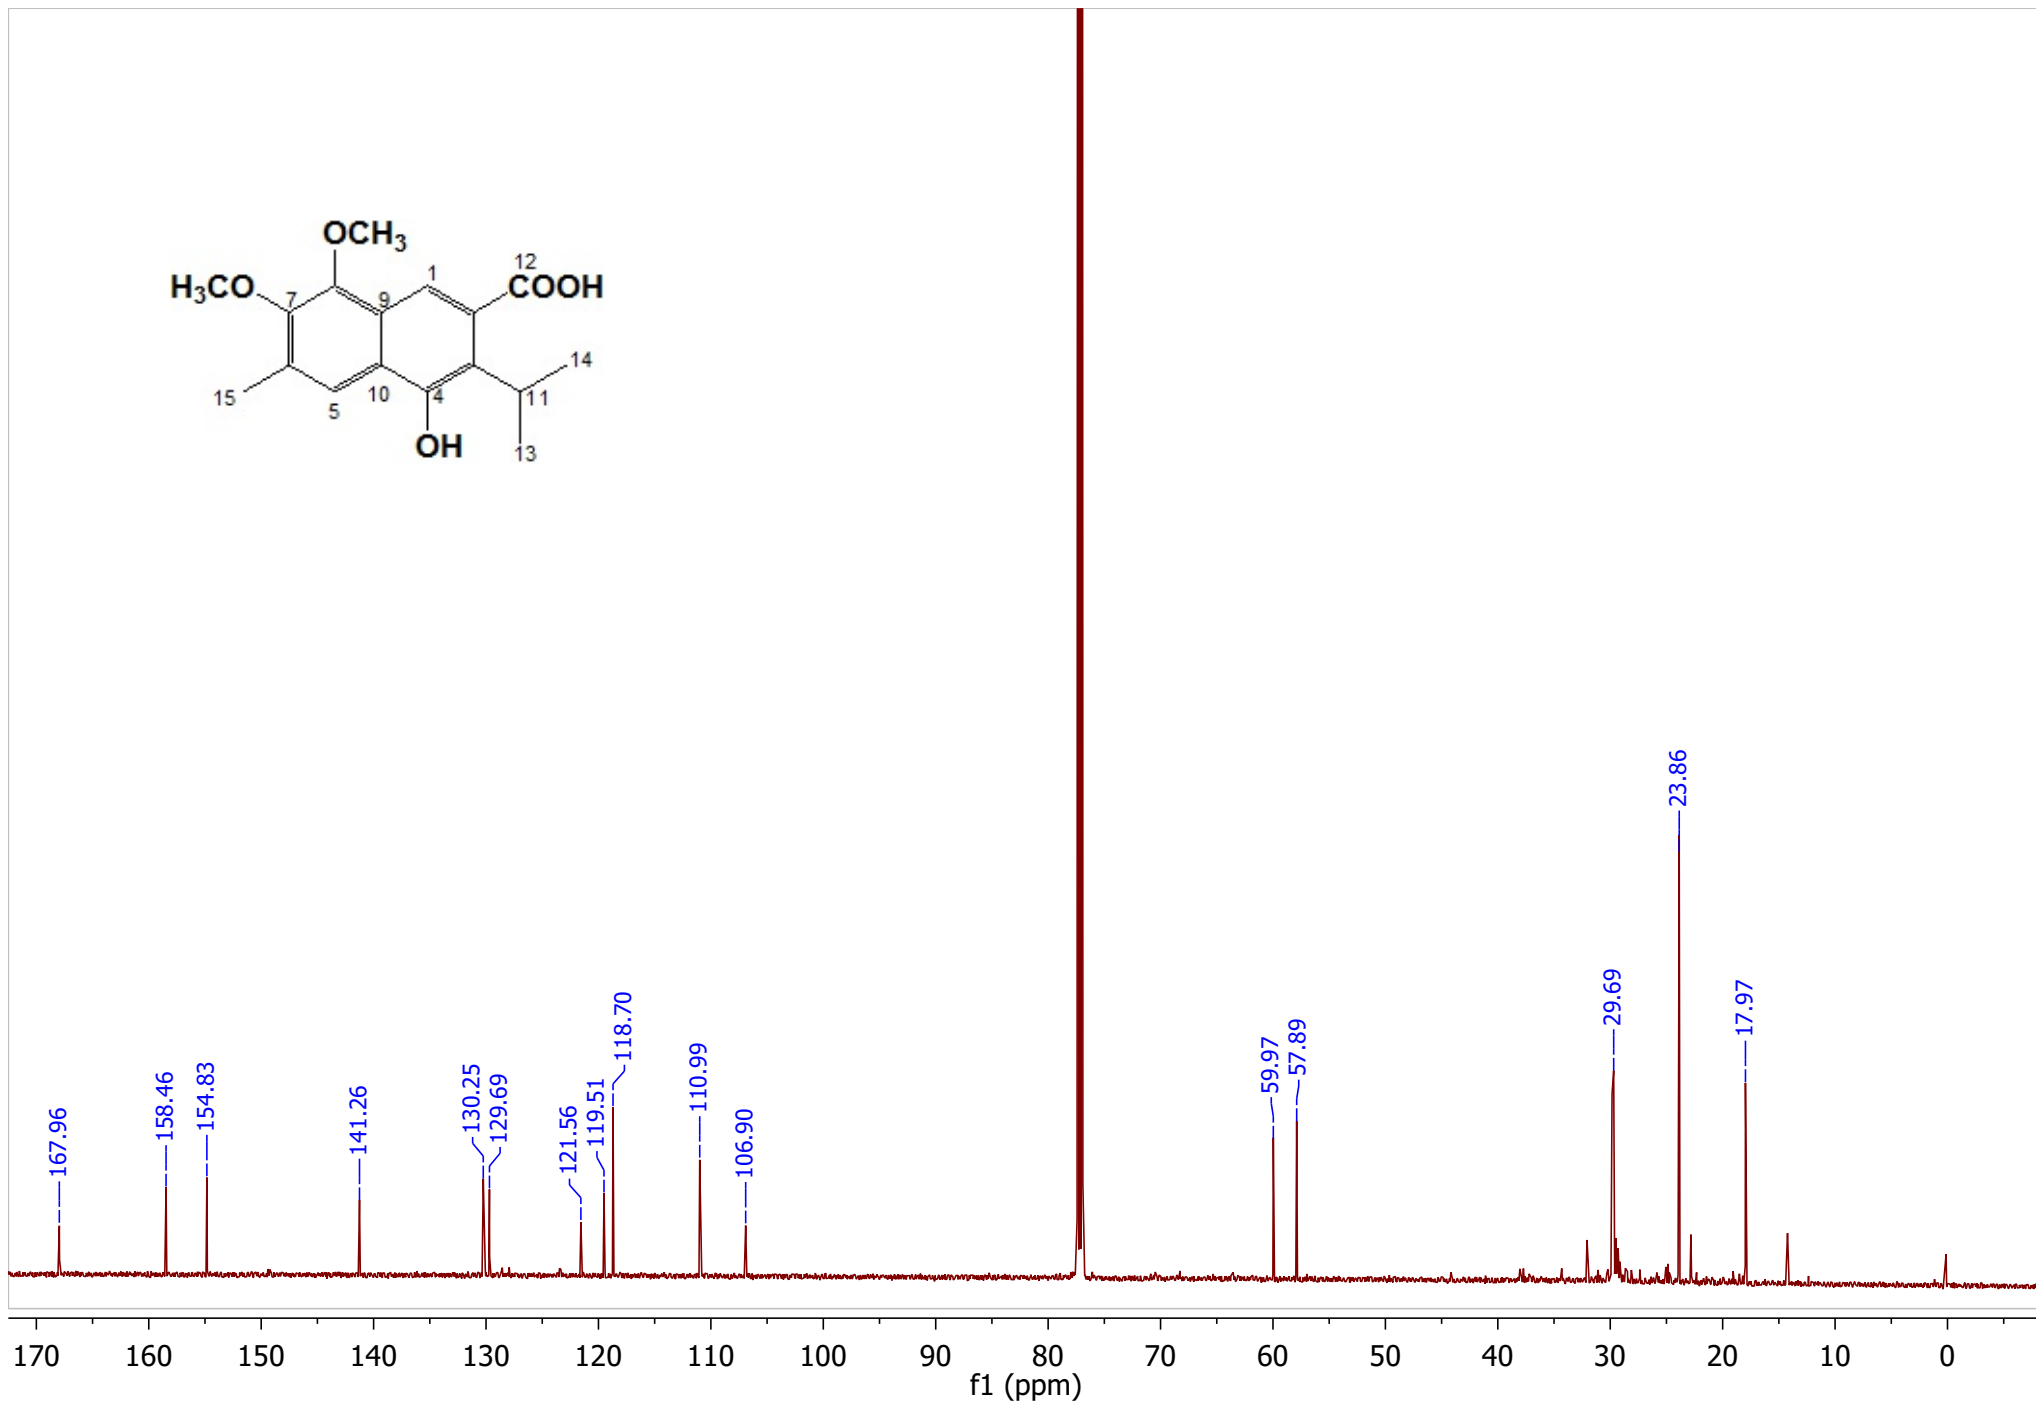

Figure S17. <sup>13</sup>C-NMR (CDCl<sub>3</sub>, 150 MHz) of 8-methyl-iso-sphaeralcic acid (7)

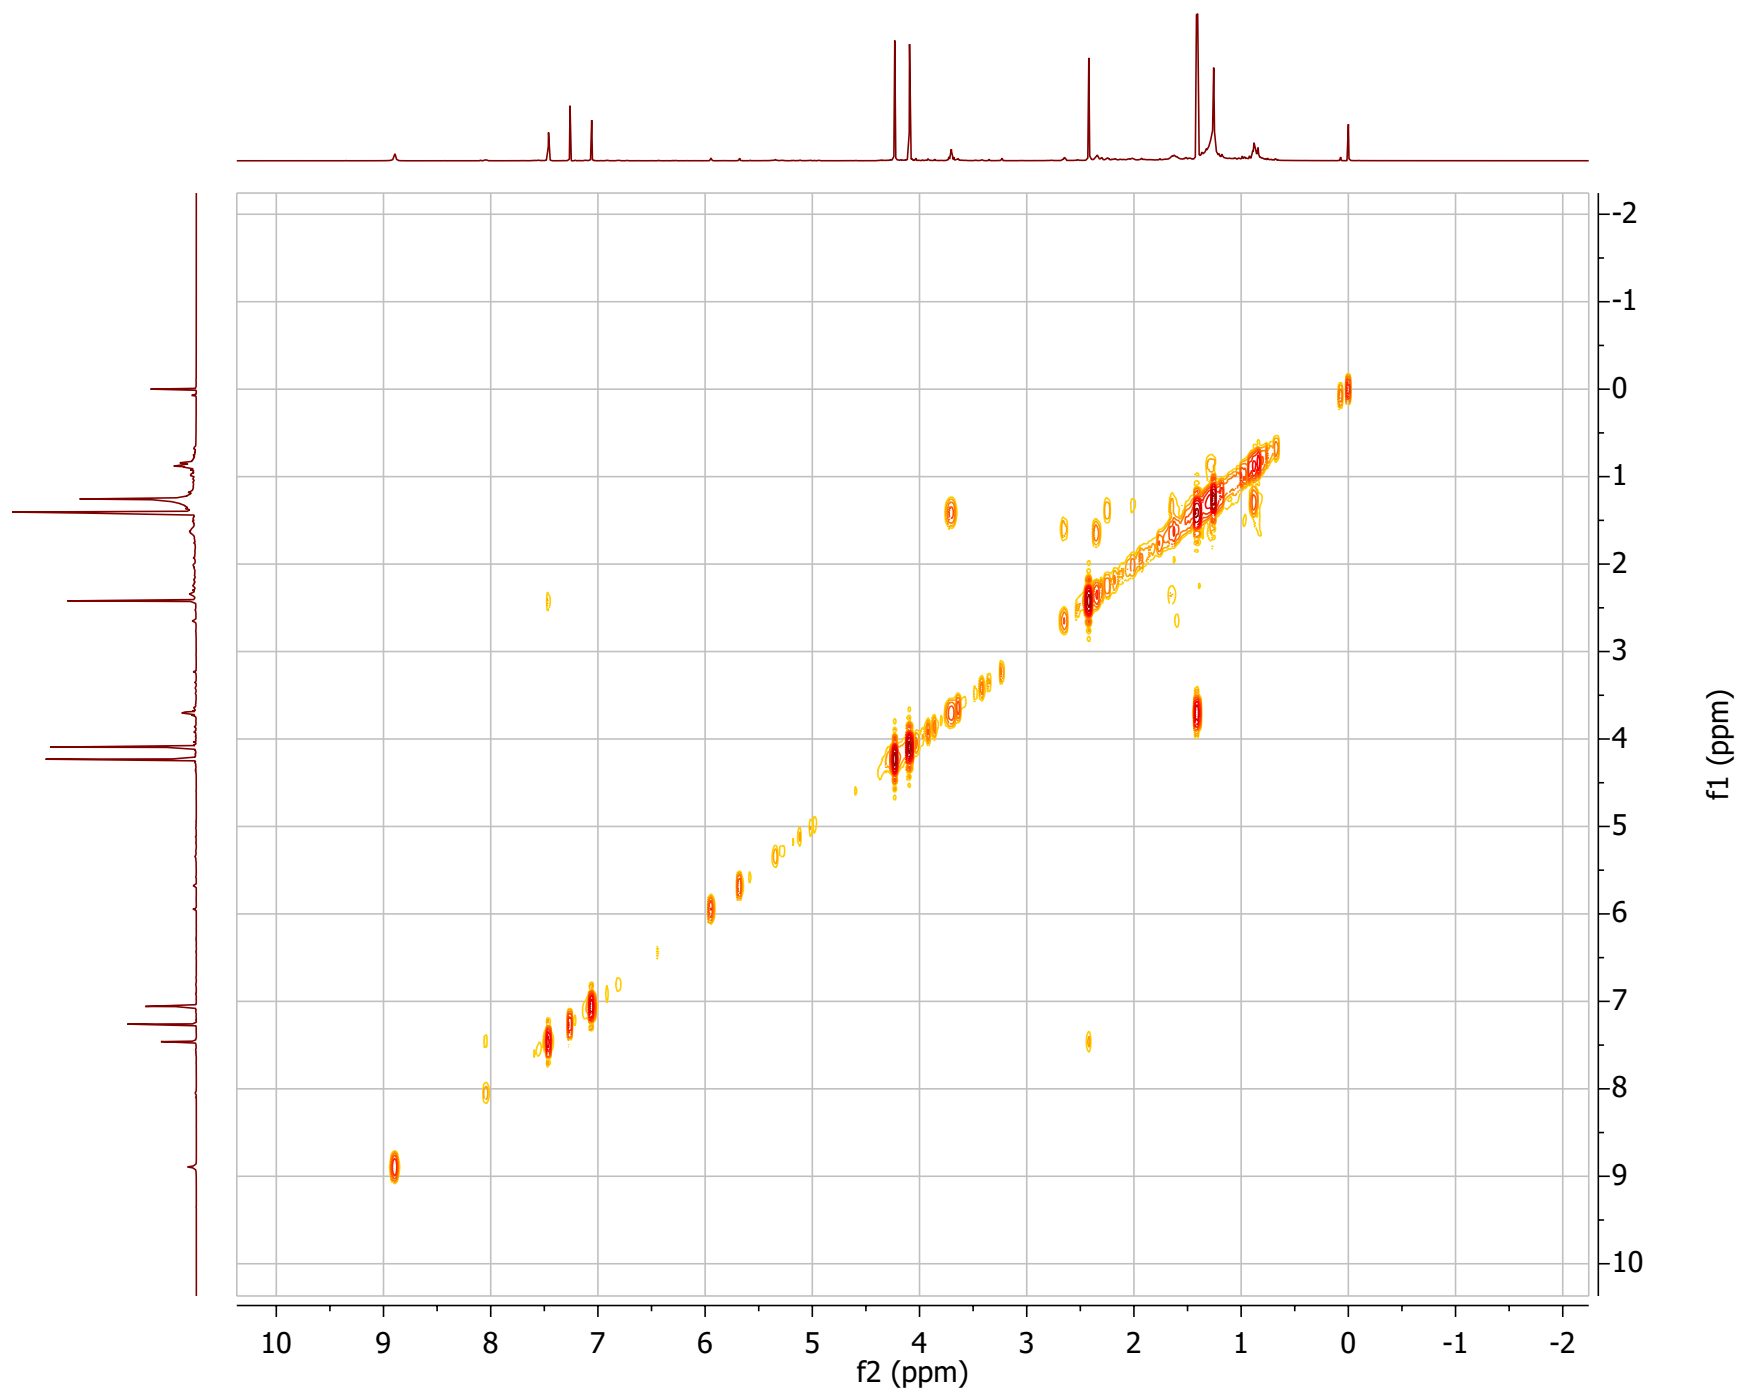

Figure S18.  $^1\text{H}$ - $^1\text{H}$  (COSY) NMR ( $\text{CDCl}_3$ , 600 MHz) of 8-methyl-iso-sphaeralcic acid (**7**)

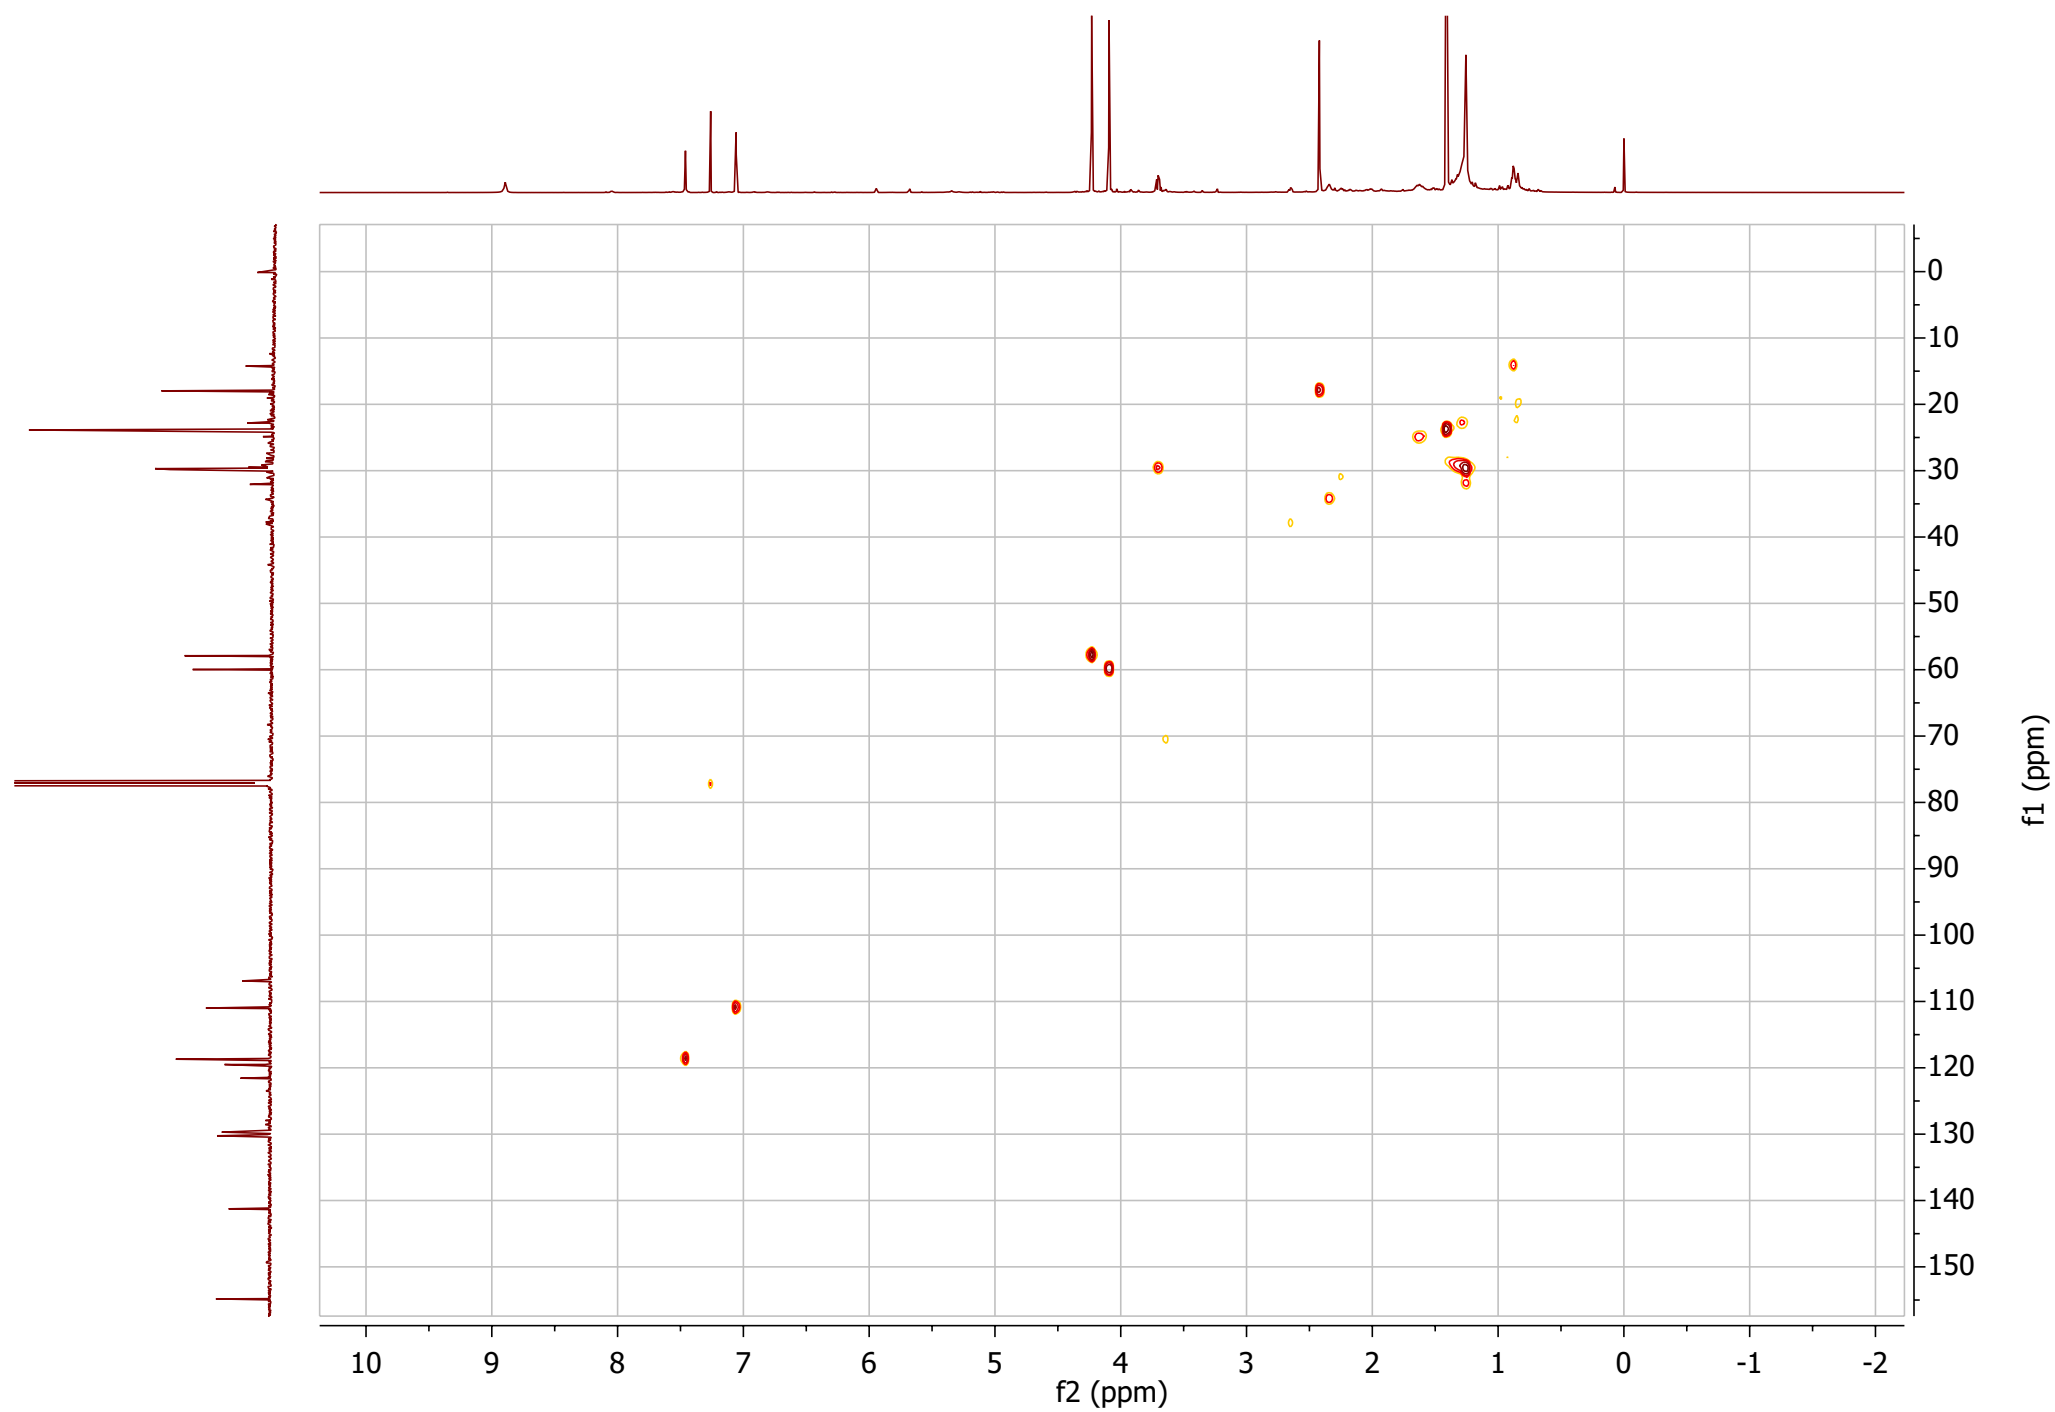

Figure S19.  $^1\text{H}$ - $^{13}\text{C}$  (HSQC) NMR ( $\text{CDCl}_3$ , 600 MHz) of 8-methyl-iso-sphaeralcic acid (7)

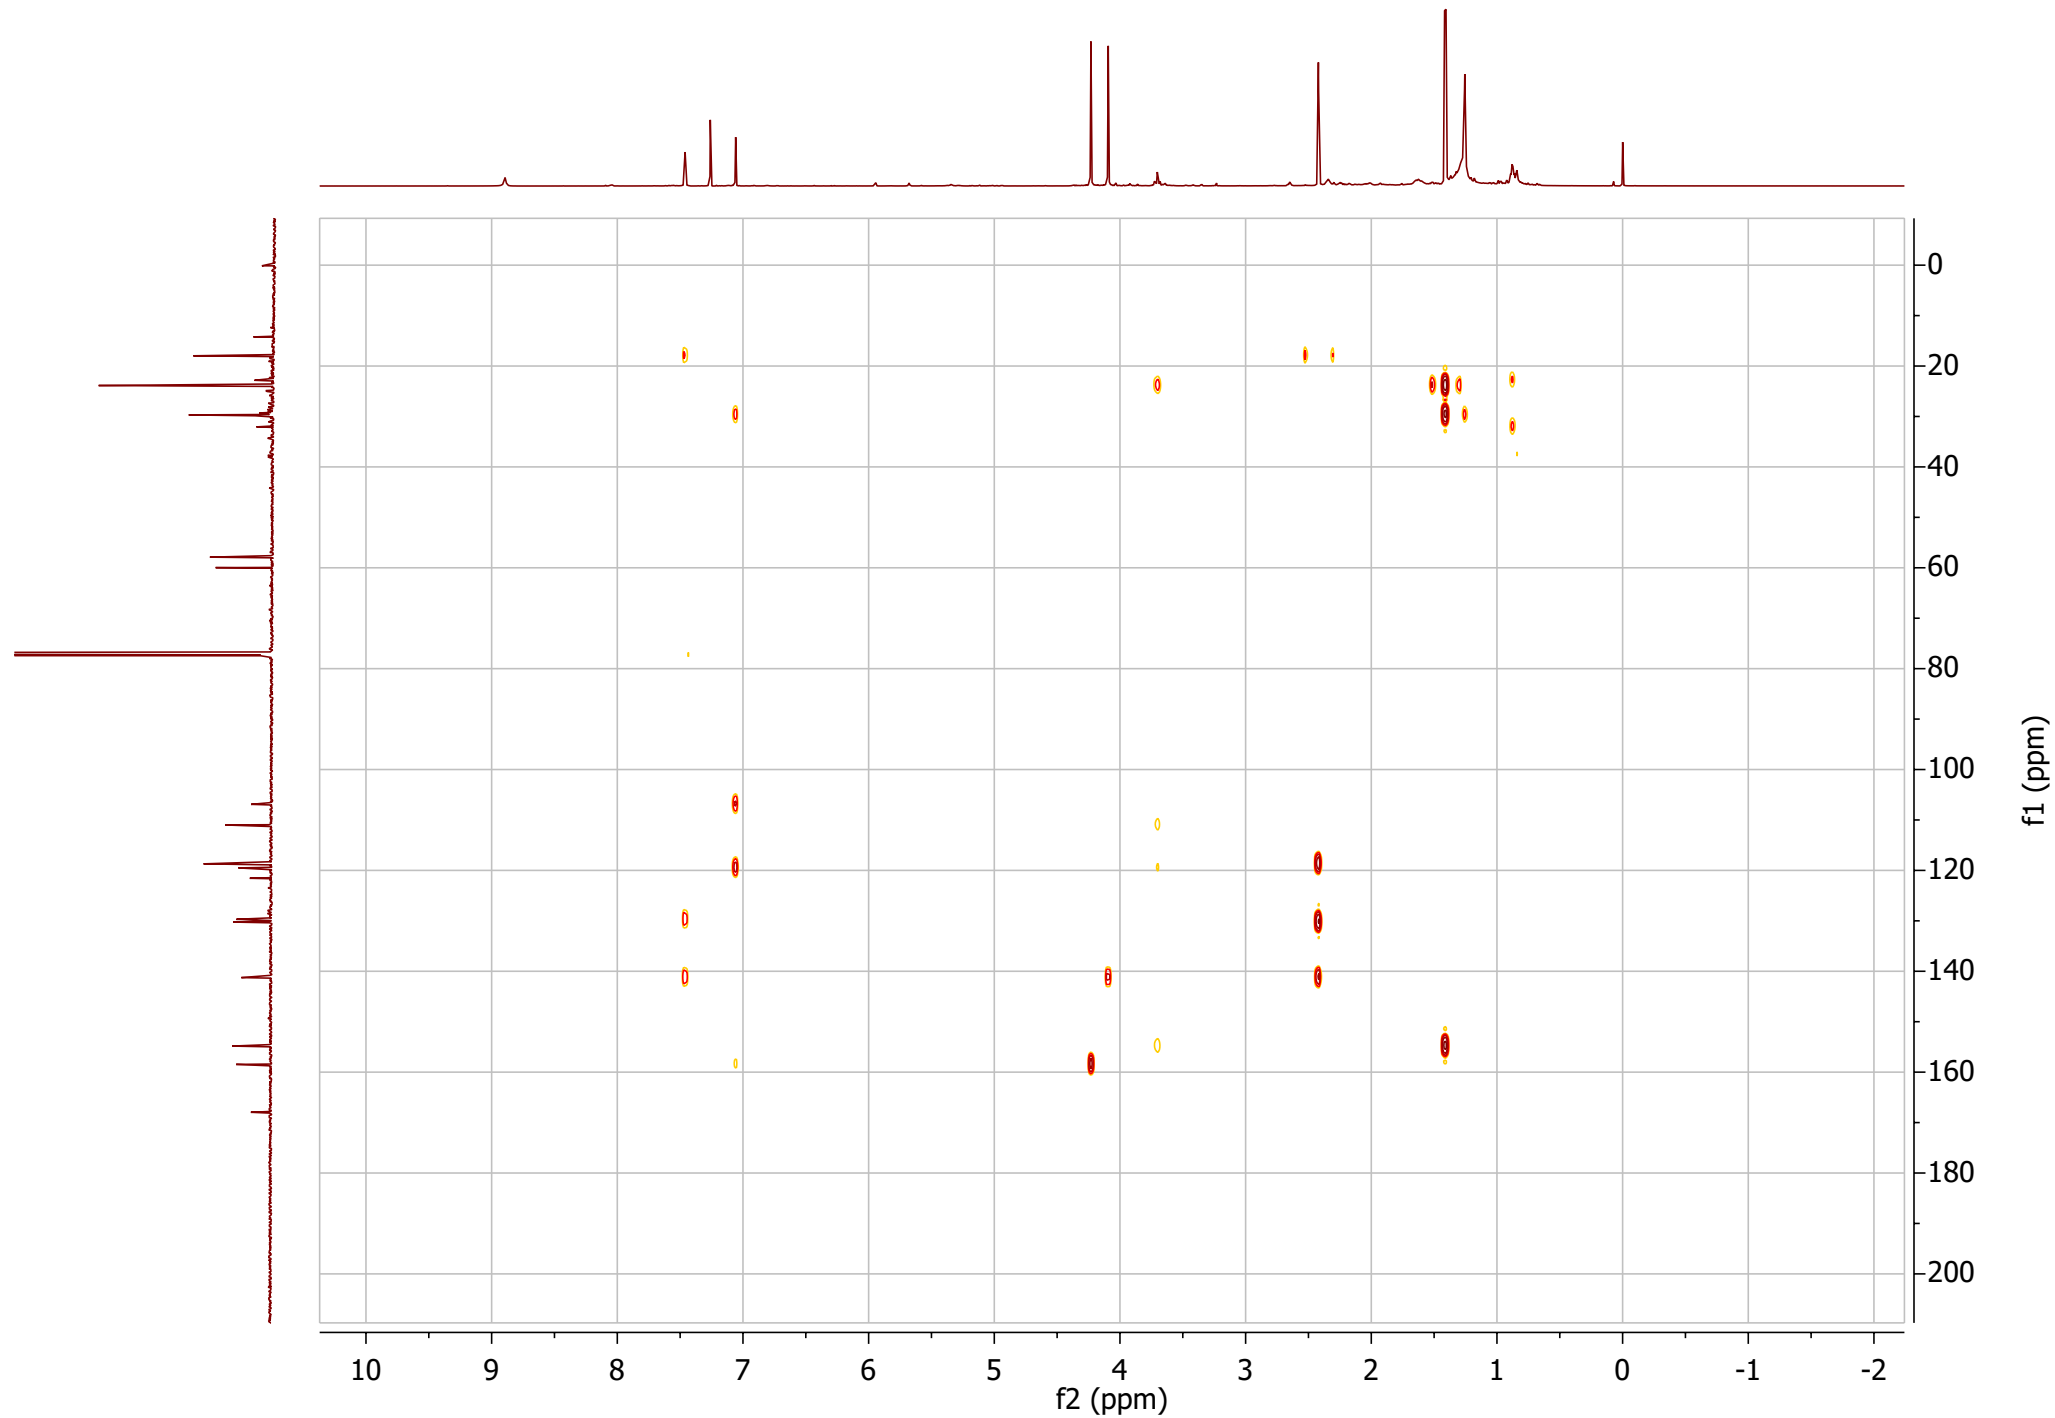

Figure S20.  $^1\text{H}$ - $^{13}\text{C}$  (HMBC) NMR ( $\text{CDCl}_3$ , 600 MHz) of 8-methyl-iso-sphaeralcic acid (7)

[ Mass Spectrum ]

Data : 009LEM

Date : 20-Feb-2023 09:51

Sample: KAR-SaCo2

Operator name M.en ITA Victoria Labastida G.

Note : CIBSur/Dra.Maribel Herrera Centro de Investigaciones Químicas UAEM

Inlet : Direct

Ion Mode : FAB+

Spectrum Type : Normal Ion [MF-Linear]

RT : 0.77 min Scan# : (7,8)

BP : m/z 286.0000 Int. : 1272.46

Output m/z range : 52.4036 to 812.4036

Cut Level : 0.00 %

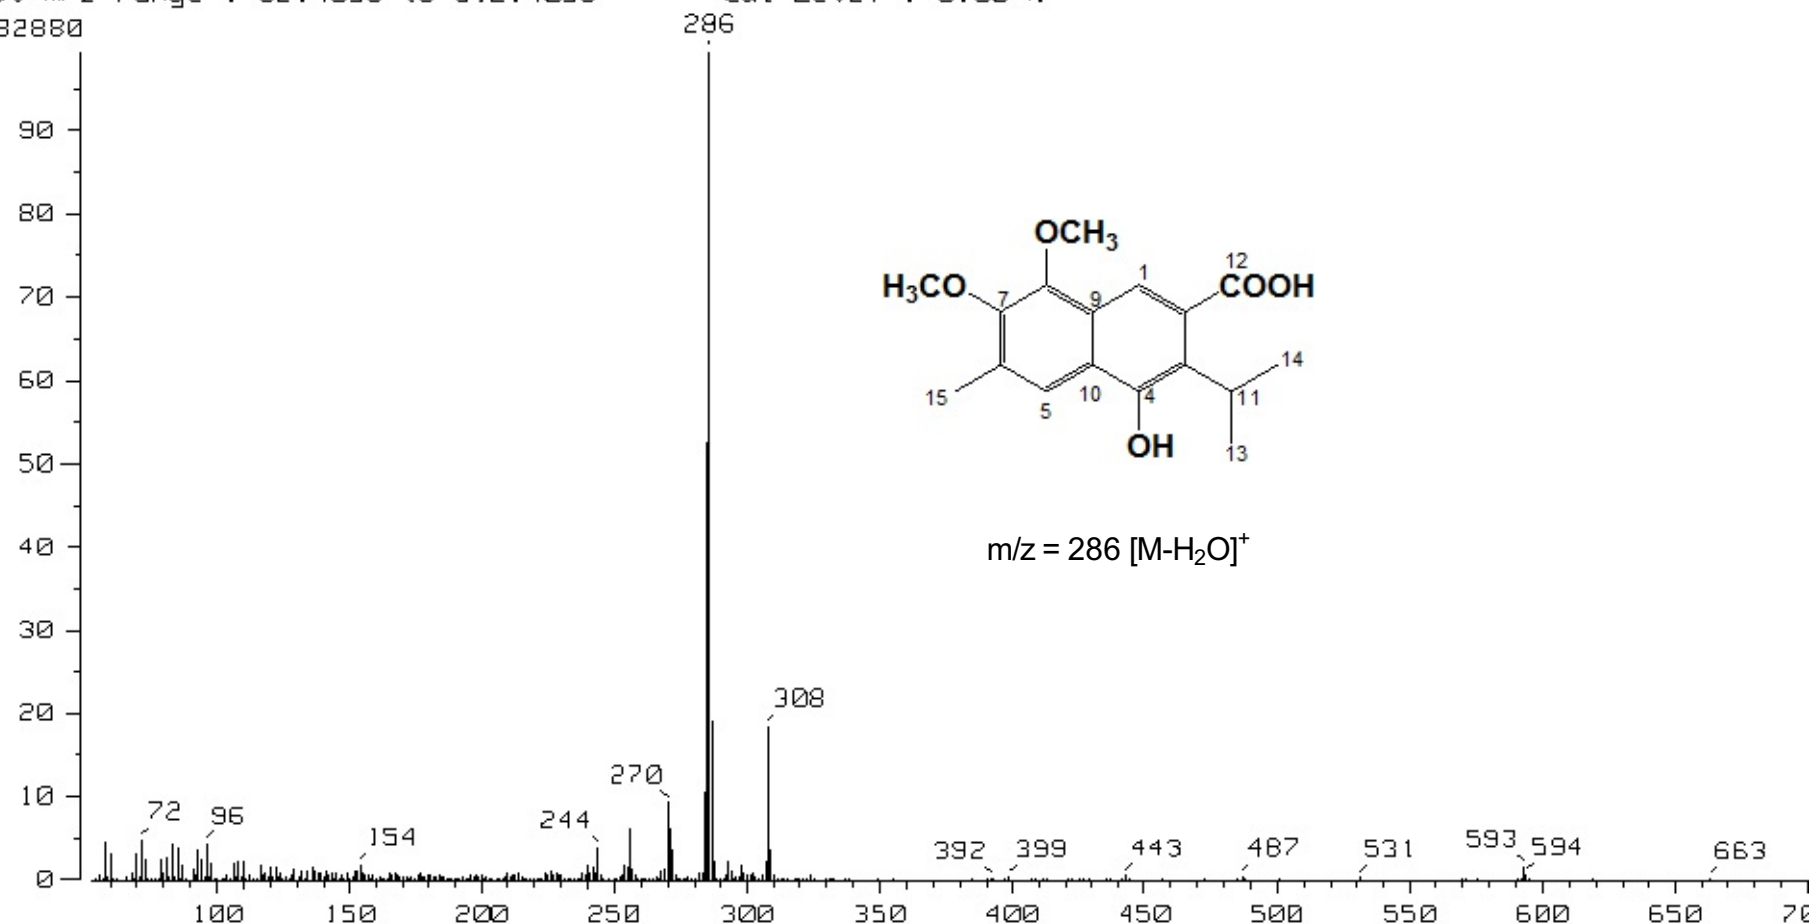

Figure S21. Mass spectrum (FAB-MS) of 8-methyl-iso-sphaeralcic acid (7)

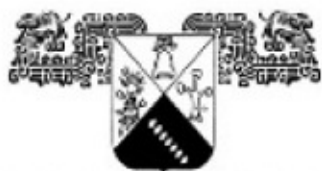

UNIVERSIDAD AUTÓNOMA DEL  
ESTADO DE MORELOS

## Servicio de Espectrometría de Masas

MStation JMS-700 JEOL Alta Resolución

Centro de Investigaciones Químicas UAEM

Tel. 329-79-97 ext.6013

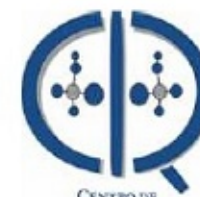

CENTRO DE  
INVESTIGACIONES QUÍMICAS

[ Elemental Composition ]

Data : 009LEM-HR

Date : 21-Feb-2023 10:36

Sample: KAR-SaCO2

Operator name M.en ITA Victoria Labastida G.

Note : CIBSur/Dra. Maribel Herrera Centro de Investigaciones Químicas UAEM

Inlet : Direct

Ion Mode : FAB+

RT : 1.15 min

Scan#: (7,57)

Elements : C 40/0, H 49/0, O 5/0

Mass Tolerance : 1000ppm, 3mmu if m/z < 3, 25mmu if m/z > 25

Unsaturation (U.S.) : 9.0 - 9.0

| Observed m/z | Int%  | Err[ppm / mmu] | U.S. | Composition   |
|--------------|-------|----------------|------|---------------|
| 286.1454     | 100.0 | +87.0 / +24.9  | 9.0  | C 17 H 18 O 4 |

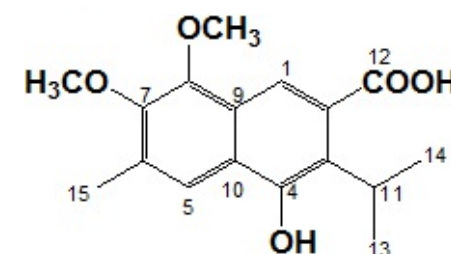

m/z = 286 [M-H<sub>2</sub>O]<sup>+</sup>  
C<sub>17</sub>H<sub>18</sub>O<sub>4</sub>

Figure S22. High resolution mass spectrum (HRFAB-MS) of 8-methyl-iso-sphaeralcic acid (7)
